# Supplementary material for: The 2D or 3D morphology of sub-nanometer Cu5 and Cu8 clusters changes the mechanism of CO oxidation
Source: Royal Society of Chemistry journal article supplement (doi:10.1039/d1cp05166k), 2022-01-01
Supplement: d1cp05166k1.pdf [file d1cp05166k1.pdf]

## Electronic Supplementary Information

### **2D or 3D morphology of sub-nanometer Cu<sub>5</sub> and Cu<sub>8</sub> clusters changes the mechanism of CO oxidation**

Estefanía Fernández,<sup>[a]</sup> Mercedes Boronat,<sup>\*[a]</sup> and Avelino Corma<sup>[a]</sup>

<sup>[a]</sup> Instituto de Tecnología Química, Universitat Politècnica de València–Consejo Superior de Investigaciones Científicas (UPV-CSIC), Av. de los Naranjos s/n, 46022 Valencia, Spain.

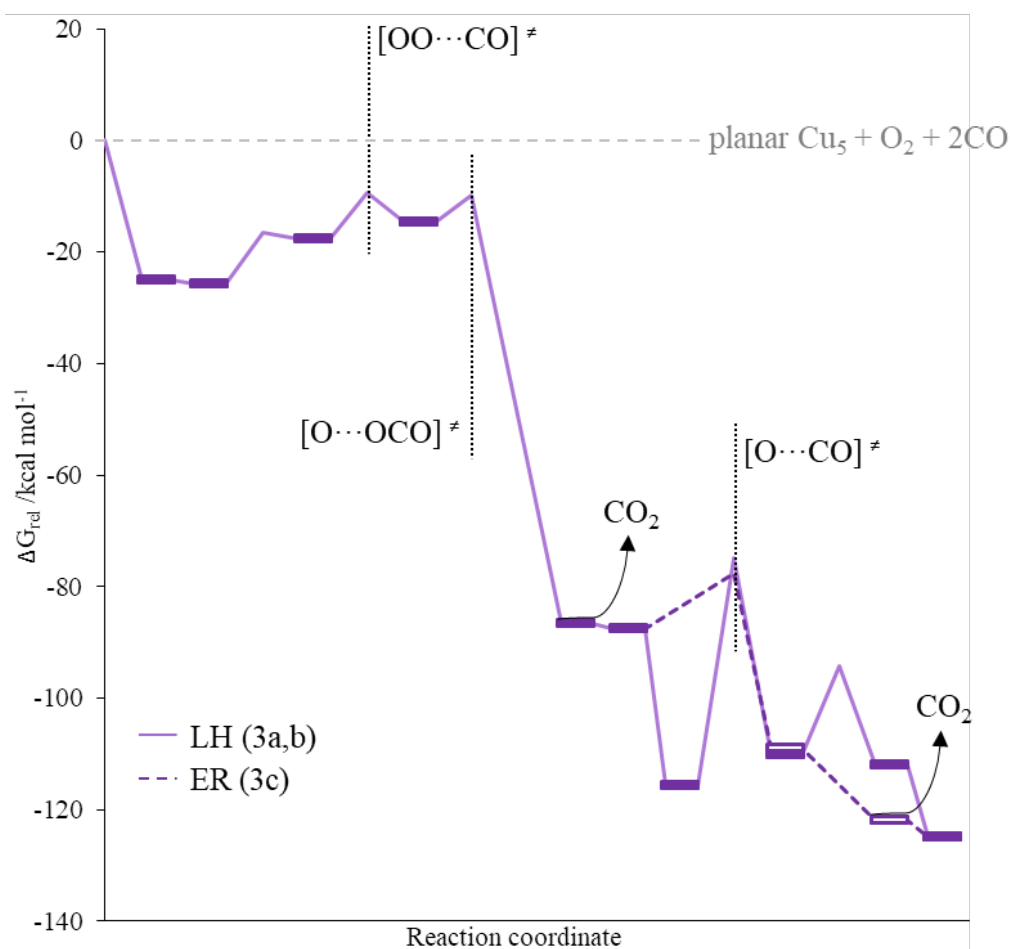

**Figure S1.** Energy profile for the CO oxidation by molecular O<sub>2</sub> in planar Cu<sub>5</sub>. a) and b,c) correspond to the first and second part of the catalytic cycle, respectively (Figure 3). Dashed lines correspond to ER paths. Key transition states of the reaction indicated by vertical dotted lines.

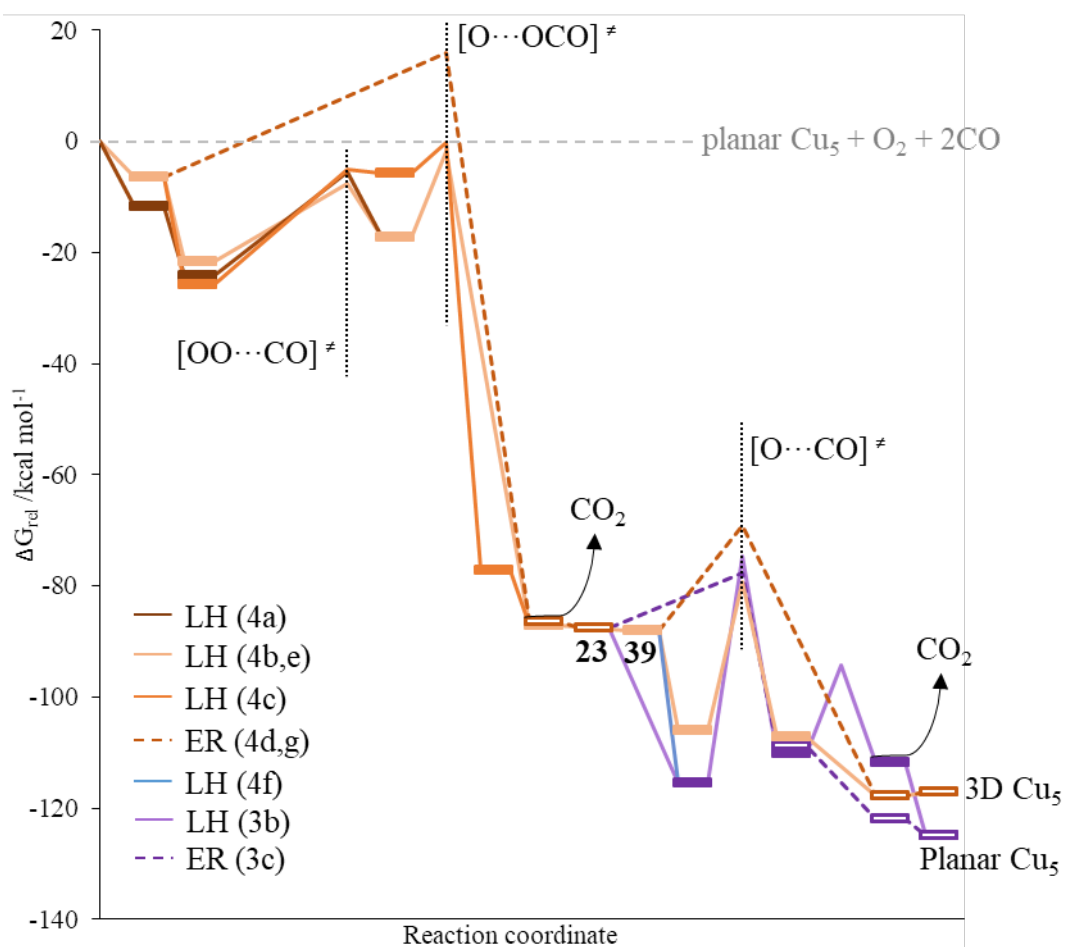

**Figure S2.** Energy profile for the CO oxidation by molecular O<sub>2</sub> in 3D Cu<sub>5</sub>. a-d) and e-f) correspond to the first and second part of the catalytic cycle, respectively (Figure 4). Dashed lines correspond to ER paths. Key transition states of the reaction indicated by vertical dotted lines. The paths from Figure 3b,c (S1) are also shown.

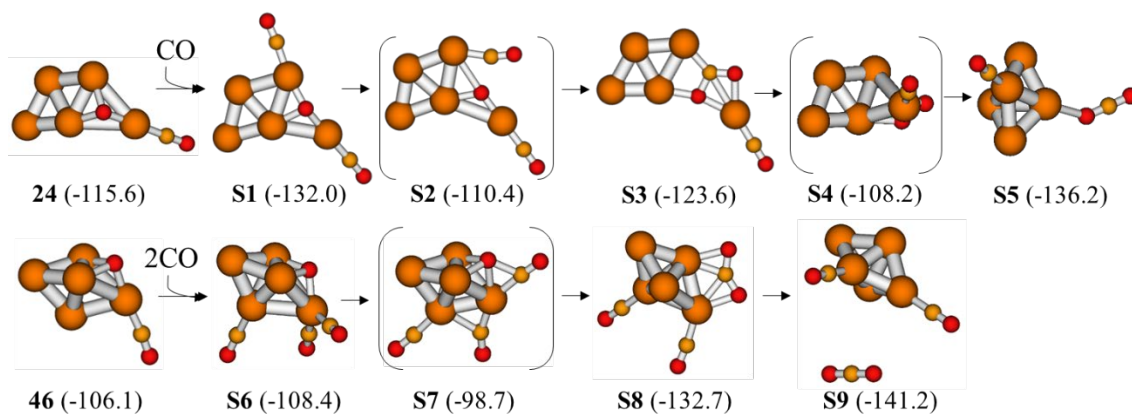

**Figure S3.** Mechanism for the second part of the  $2\text{CO} + \text{O}_2$  catalytic cycle (CO oxidation by atomic O), from structures **24** and **46** when more CO molecules are adsorbed. Relative Gibbs free energies with respect to separate planar  $\text{Cu}_5 + \text{O}_2 + 3/4\text{CO}$  in  $\text{kcal mol}^{-1}$  are given in parenthesis. Cu in orange, C in amber, O in red.

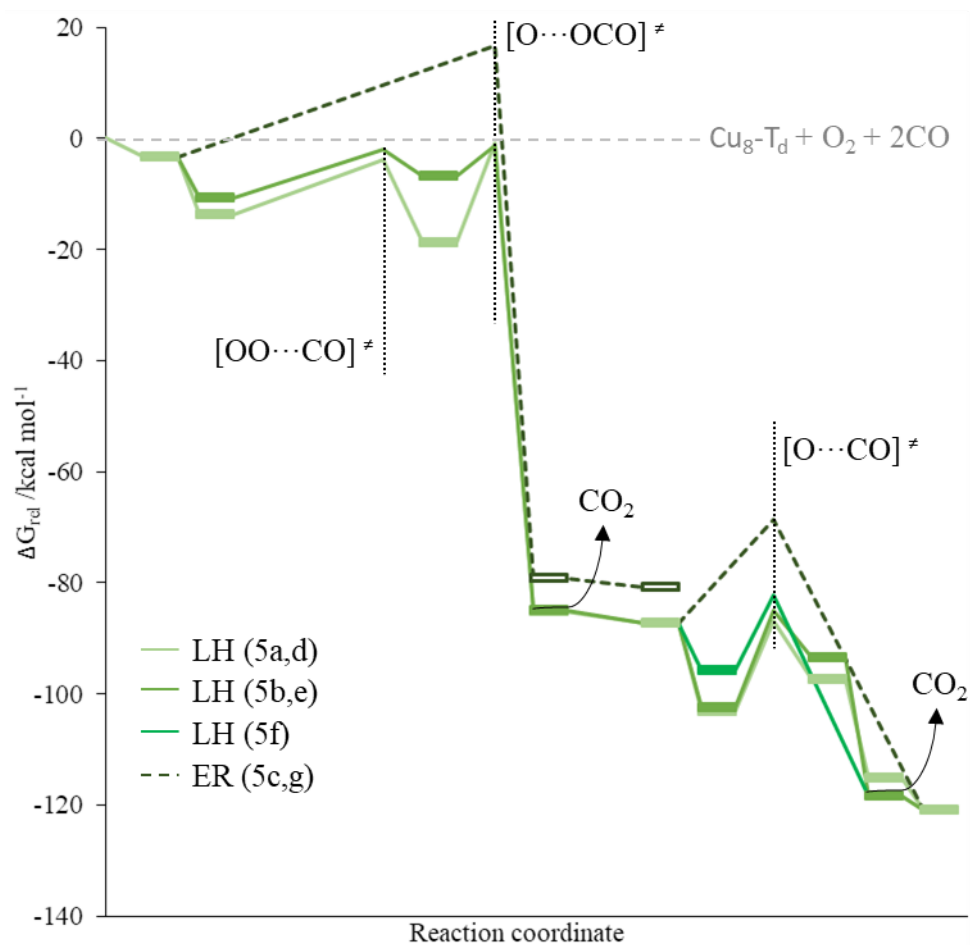

**Figure S4.** Energy profile for the CO oxidation by molecular O<sub>2</sub> in Cu<sub>8</sub>-T<sub>d</sub>. a-c) and d-g) correspond to the first and second part of the catalytic cycle, respectively (Figure 5). Dashed lines correspond to ER paths. Key transition states of the reaction indicated by vertical dotted lines.

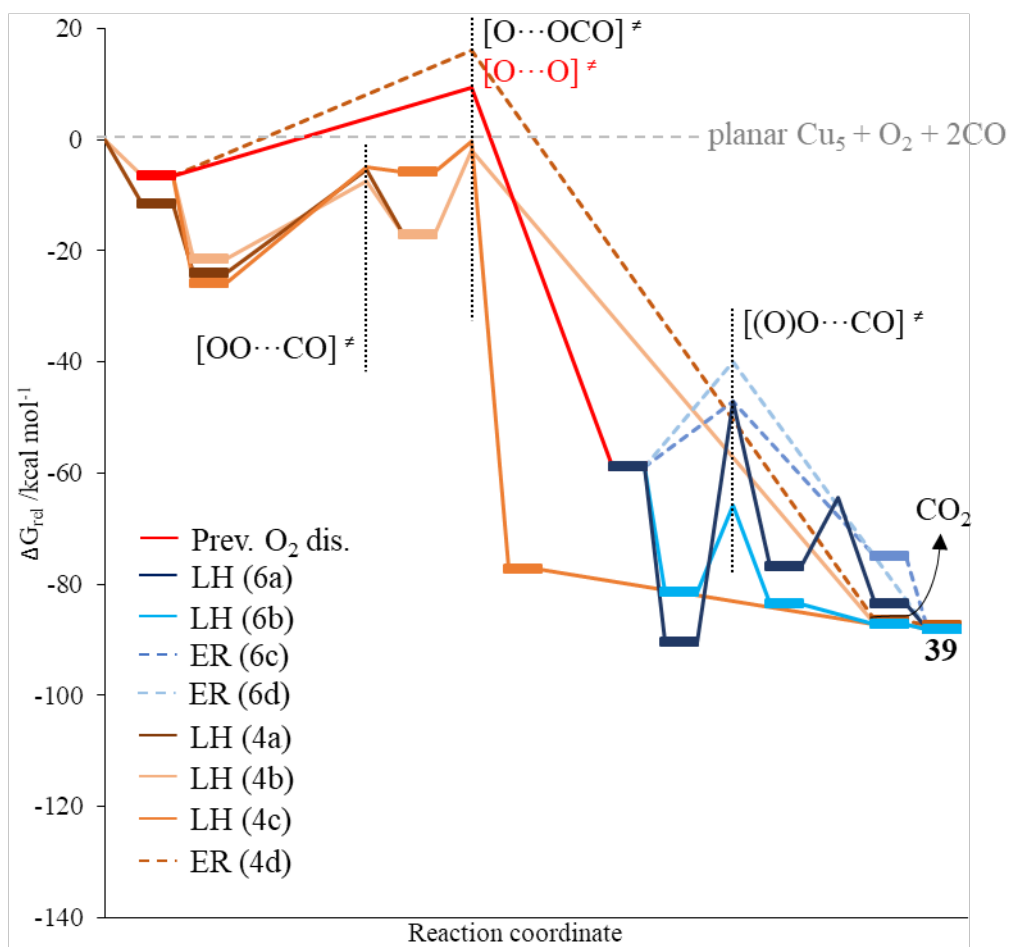

**Figure S5.** Energy profile of the first part of the catalytic cycle for CO oxidation by previously dissociated O<sub>2</sub> on Cu<sub>5</sub> (Figure 6). The second part of the cycle follows the paths shown for structure **39** (Figures 4, S2). The energy profile for the reaction with molecular O<sub>2</sub> up to structure **39** is kept for comparison (Figures 4, S2). Dashed lines correspond to ER paths. Key transition states indicated by vertical dotted lines.

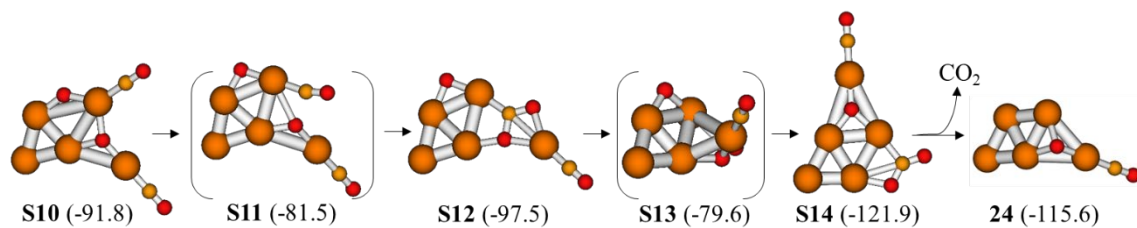

**Figure S6.** Mechanism for CO oxidation from structure **85** when another CO is adsorbed. Relative Gibbs free energies with respect to separate planar  $\text{Cu}_5 + \text{O}_2 + 3\text{CO}$  in  $\text{kcal mol}^{-1}$  are given in parenthesis. Cu in orange, C in amber, O in red.

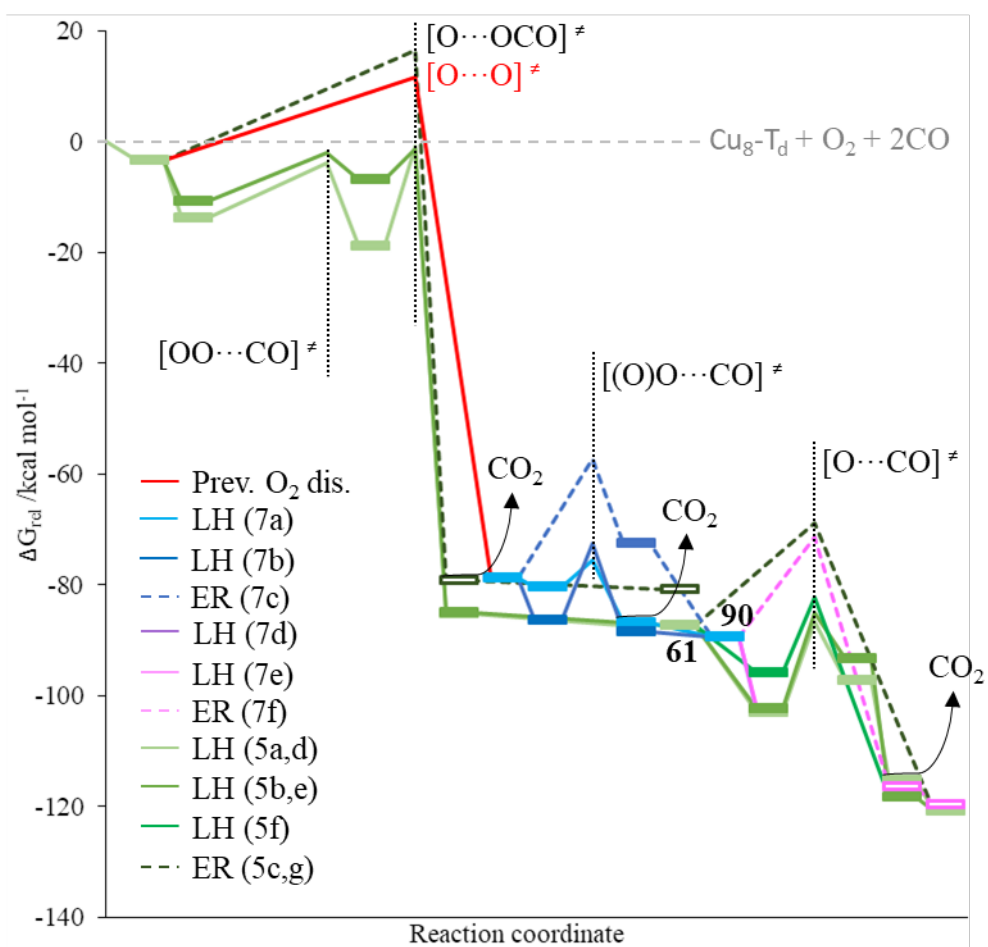

**Figure S7.** Energy profile of the catalytic cycle for CO oxidation by previously dissociated O<sub>2</sub> on Cu<sub>8</sub> (Figure 7). The energy profile for the reaction with molecular O<sub>2</sub> is kept for comparison (Figures 5, S4). Dashed lines correspond to ER paths. Key transition states indicated by vertical dotted lines.



**Table S1.** Cartesian coordinates of all structures presented, optimized at the B3PW91/Def2TZVP level. Charge and multiplicity are also indicated, along with the number of the first figure the structure is shown in.

| Figure | #Structure | Charge Multiplicity<br>Coordinates                                                                                                                                                                                                                     |
|--------|------------|--------------------------------------------------------------------------------------------------------------------------------------------------------------------------------------------------------------------------------------------------------|
| 1      | #1         | 0 2<br>Cu -2.148782 -0.069273 -0.000209<br>Cu 0.199133 -0.669338 -0.000029<br>Cu -0.387932 1.651398 0.000733<br>Cu 2.006057 0.952404 -0.001119<br>Cu 2.507291 -1.391348 0.000348<br>C -3.953919 -0.644819 0.000240<br>O -4.921720 -1.234064 0.000823   |
| 1      | #2         | 0 2<br>Cu -1.432704 2.071715 0.002112<br>Cu 0.654202 0.913780 -0.007964<br>Cu -1.407074 -0.361104 -0.000436<br>Cu 0.850853 -1.479477 -0.011510<br>Cu 2.852081 -0.091878 0.012584<br>C -2.753807 -1.661094 0.009232<br>O -3.435068 -2.571435 0.011979   |
| 1      | #3         | 0 2<br>Cu 2.413671 -1.144943 -0.002124<br>Cu -0.000120 -1.164092 0.003550<br>Cu 1.274664 0.965184 0.000768<br>Cu -1.274342 0.965187 -0.005297<br>Cu -2.413879 -1.144642 0.001078<br>C -0.000068 2.484678 0.000413<br>O 0.000074 3.658473 0.007029      |
| 1      | #4         | 0 2<br>Cu -0.415879 -2.024329 -0.000829<br>Cu 1.040365 -0.020292 -0.000850<br>Cu -0.988244 0.016425 1.254799<br>Cu -0.346076 2.035159 -0.000868<br>Cu -0.990655 0.016417 -1.252056<br>C 2.872785 -0.041654 -0.000666<br>O 4.009682 -0.053512 -0.000211 |
| 1      | #5         | 0 2<br>Cu -2.054178 -0.339977 -0.000048<br>Cu 0.000549 0.493603 1.184483<br>Cu 0.000578 0.493360 -1.184149<br>Cu 2.053002 -0.345949 -0.000031<br>Cu -0.002440 -1.649930 -0.000033<br>C 0.003811 2.133905 -0.000815<br>O 0.006166 3.289304 -0.000192    |
| 1      | #6         | 0 1<br>Cu 1.619812 0.373920 -0.000461                                                                                                                                                                                                                  |

|          |            |     |           |           |           |
|----------|------------|-----|-----------|-----------|-----------|
|          |            | Cu  | -0.572891 | 0.494392  | 1.258090  |
|          |            | Cu  | 0.710090  | -1.559648 | 1.307334  |
|          |            | Cu  | 0.708657  | -1.559479 | -1.307764 |
|          |            | Cu  | -0.573559 | 0.495269  | -1.258761 |
|          |            | Cu  | 0.227090  | 2.413758  | 0.000365  |
|          |            | Cu  | -1.394792 | -1.455447 | 0.000188  |
|          |            | Cu  | -2.726055 | 0.541419  | 0.000892  |
|          |            | C   | 3.499520  | 0.481560  | -0.000085 |
|          |            | O   | 4.631337  | 0.566158  | 0.000488  |
| <b>1</b> | <b>#7</b>  | O 1 |           |           |           |
|          |            | Cu  | -0.205121 | 0.224312  | -1.521974 |
|          |            | Cu  | 0.133550  | -1.638389 | -0.002385 |
|          |            | Cu  | -2.057684 | -0.463425 | -0.002564 |
|          |            | Cu  | -0.981670 | 1.971264  | 0.001475  |
|          |            | Cu  | 1.396100  | 1.371020  | 0.002650  |
|          |            | Cu  | 2.062128  | -0.627978 | -1.259665 |
|          |            | Cu  | -0.207366 | 0.220471  | 1.521381  |
|          |            | Cu  | 2.060038  | -0.631585 | 1.260495  |
|          |            | C   | -3.927425 | -0.731932 | -0.000158 |
|          |            | O   | -5.029338 | -0.994173 | 0.002248  |
| <b>1</b> | <b>#8</b>  | O 1 |           |           |           |
|          |            | Cu  | 0.215150  | -1.403766 | 0.159746  |
|          |            | Cu  | 0.237004  | 0.560599  | -1.287774 |
|          |            | Cu  | 2.298698  | -0.017237 | 0.015669  |
|          |            | Cu  | -1.171504 | -0.934143 | 2.137509  |
|          |            | Cu  | -1.867443 | 0.013370  | -0.010859 |
|          |            | Cu  | -1.146961 | -1.382826 | -1.889843 |
|          |            | Cu  | 0.223701  | 0.830579  | 1.139507  |
|          |            | Cu  | -1.126443 | 2.334387  | -0.264064 |
|          |            | C   | 4.196371  | -0.009556 | 0.008019  |
|          |            | O   | 5.327247  | 0.003673  | -0.005620 |
| <b>1</b> | <b>#9</b>  | O 1 |           |           |           |
|          |            | Cu  | -0.755263 | 1.411170  | -0.049961 |
|          |            | Cu  | -0.756650 | -0.660997 | 1.245326  |
|          |            | Cu  | 0.587528  | 1.248100  | 1.995978  |
|          |            | Cu  | 0.591498  | 1.106100  | -2.076947 |
|          |            | Cu  | -0.755550 | -0.746020 | -1.197973 |
|          |            | Cu  | -2.796538 | 0.001844  | -0.000638 |
|          |            | Cu  | 1.400283  | -0.004065 | 0.000748  |
|          |            | Cu  | 0.581899  | -2.354973 | 0.082342  |
|          |            | C   | 3.292707  | -0.003371 | 0.002123  |
|          |            | O   | 4.428094  | -0.001672 | 0.002485  |
| <b>1</b> | <b>#10</b> | O 2 |           |           |           |
|          |            | Cu  | 2.463773  | -0.928936 | -0.000032 |
|          |            | Cu  | -0.000015 | -0.811873 | 0.000010  |
|          |            | Cu  | 1.279251  | 1.221370  | 0.000046  |
|          |            | Cu  | -1.279225 | 1.221398  | -0.000010 |
|          |            | Cu  | -2.463805 | -0.928880 | 0.000024  |
|          |            | C   | 4.229147  | -1.622807 | -0.000134 |
|          |            | O   | 5.361010  | -1.711240 | -0.000177 |
|          |            | C   | 1.982404  | 2.951996  | 0.000132  |

|          |            |     |           |           |           |
|----------|------------|-----|-----------|-----------|-----------|
|          |            | O   | 2.357872  | 4.029513  | 0.000198  |
|          |            | C   | -0.000037 | -2.666145 | 0.000083  |
|          |            | O   | -0.000053 | -3.808369 | 0.000136  |
|          |            | C   | -1.982305 | 2.952053  | -0.000125 |
|          |            | O   | -2.357725 | 4.029587  | -0.000209 |
|          |            | C   | -4.229183 | -1.622738 | -0.000013 |
|          |            | O   | -5.361047 | -1.711173 | -0.000044 |
| <b>1</b> | <b>#11</b> | O 2 |           |           |           |
|          |            | Cu  | 2.418971  | -0.862810 | 0.153734  |
|          |            | Cu  | 0.000009  | -0.853748 | 0.000037  |
|          |            | Cu  | 1.190772  | 1.257954  | -0.140956 |
|          |            | Cu  | -1.190733 | 1.258018  | 0.140934  |
|          |            | Cu  | -2.418950 | -0.862717 | -0.153751 |
|          |            | C   | 4.058983  | -1.773203 | 0.360134  |
|          |            | O   | 4.985015  | -2.409817 | 0.495231  |
|          |            | C   | 2.865045  | 1.948823  | -0.563812 |
|          |            | O   | 3.945987  | 2.240024  | -0.783978 |
|          |            | C   | -0.000093 | -2.697922 | 0.000054  |
|          |            | O   | -0.000143 | -3.842773 | 0.000042  |
|          |            | C   | -2.865077 | 1.948648  | 0.563869  |
|          |            | O   | -3.946044 | 2.239747  | 0.784060  |
|          |            | C   | -4.058963 | -1.773089 | -0.360201 |
|          |            | O   | -4.985003 | -2.409670 | -0.495401 |
|          |            | C   | -0.000050 | 2.866984  | 0.000007  |
|          |            | O   | 0.000055  | 4.021783  | 0.000016  |
| <b>1</b> | <b>#12</b> | O 2 |           |           |           |
|          |            | Cu  | 2.153036  | 0.123782  | -0.000406 |
|          |            | Cu  | 0.000272  | -0.641980 | 1.211646  |
|          |            | Cu  | -0.000017 | -0.642574 | -1.211407 |
|          |            | Cu  | -2.153049 | 0.123180  | 0.000097  |
|          |            | Cu  | -0.000221 | 1.368834  | -0.000422 |
|          |            | C   | 0.000276  | -2.015945 | 2.456969  |
|          |            | O   | 0.000250  | -2.757208 | 3.320998  |
|          |            | C   | 4.058595  | 0.167914  | -0.000394 |
|          |            | O   | 5.191715  | 0.175292  | 0.000056  |
|          |            | C   | -0.000097 | -2.017530 | -2.455606 |
|          |            | O   | -0.000163 | -2.759565 | -3.318976 |
|          |            | C   | -4.058595 | 0.167471  | 0.000002  |
|          |            | O   | -5.191707 | 0.175807  | -0.000291 |
|          |            | C   | -0.000194 | 3.197652  | -0.000407 |
|          |            | O   | -0.000161 | 4.340247  | -0.000427 |
| <b>1</b> | <b>#13</b> | O 2 |           |           |           |
|          |            | Cu  | 2.295273  | -0.000087 | 0.074308  |
|          |            | Cu  | -0.000060 | 1.196617  | -0.794786 |
|          |            | Cu  | 0.000000  | 0.000507  | 1.437515  |
|          |            | Cu  | -2.295223 | 0.000130  | 0.074276  |
|          |            | Cu  | -0.000133 | -1.197254 | -0.793868 |
|          |            | C   | 0.000176  | 3.051026  | -0.994530 |
|          |            | O   | 0.000278  | 4.147034  | -1.310440 |
|          |            | C   | 2.906363  | 0.000985  | 1.868547  |
|          |            | O   | 3.260451  | 0.001575  | 2.949137  |
|          |            | C   | 0.000183  | 1.652825  | 2.373766  |

|          |            |     |           |           |           |
|----------|------------|-----|-----------|-----------|-----------|
|          |            | O   | 0.000325  | 2.701638  | 2.813232  |
|          |            | C   | -2.906367 | 0.001200  | 1.868479  |
|          |            | O   | -3.260600 | 0.001834  | 2.949023  |
|          |            | C   | -0.000367 | -3.051690 | -0.993122 |
|          |            | O   | -0.000609 | -4.147779 | -1.308748 |
|          |            | C   | -2.846960 | 1.559247  | -0.876368 |
|          |            | O   | -3.247446 | 2.473003  | -1.420377 |
|          |            | C   | 0.000067  | -0.000765 | -2.458124 |
|          |            | O   | 0.000246  | -0.001371 | -3.624914 |
|          |            | C   | -2.847326 | -1.559895 | -0.874621 |
|          |            | O   | -3.247969 | -2.474166 | -1.417645 |
|          |            | C   | 2.847210  | 1.558854  | -0.876567 |
|          |            | O   | 3.247709  | 2.472455  | -1.420814 |
|          |            | C   | 2.847347  | -1.560189 | -0.874536 |
|          |            | O   | 3.247839  | -2.474503 | -1.417586 |
|          |            | C   | 0.000005  | -1.651185 | 2.374893  |
|          |            | O   | 0.000041  | -2.699716 | 2.815033  |
| <b>1</b> | <b>#14</b> | O 1 |           |           |           |
|          |            | Cu  | 0.670787  | 1.213778  | -0.249591 |
|          |            | Cu  | 0.669309  | -1.214749 | -0.248768 |
|          |            | Cu  | 2.763281  | -0.001822 | -0.590244 |
|          |            | Cu  | -1.460552 | 2.324673  | 0.095857  |
|          |            | Cu  | -1.119992 | 0.001054  | 0.839106  |
|          |            | Cu  | 1.273851  | -0.000089 | 1.842190  |
|          |            | Cu  | -1.189535 | 0.000204  | -1.579593 |
|          |            | Cu  | -1.462834 | -2.323158 | 0.099176  |
|          |            | C   | 1.501908  | 2.784879  | -0.722645 |
|          |            | O   | 2.000114  | 3.765218  | -1.044033 |
|          |            | C   | 4.554356  | -0.003223 | -1.181702 |
|          |            | O   | 5.545417  | -0.004131 | -1.731784 |
|          |            | C   | -2.719129 | 0.002246  | 1.740812  |
|          |            | O   | -3.693731 | 0.002969  | 2.342392  |
|          |            | C   | -2.499370 | 3.892855  | 0.184734  |
|          |            | O   | -3.081705 | 4.859212  | 0.287152  |
|          |            | C   | 1.987529  | 0.000117  | 3.597414  |
|          |            | O   | 2.157952  | 0.000641  | 4.719206  |
|          |            | C   | 1.498777  | -2.787035 | -0.720675 |
|          |            | O   | 1.995892  | -3.768140 | -1.041422 |
|          |            | C   | -1.928812 | -0.000782 | -3.317104 |
|          |            | O   | -2.273782 | -0.001755 | -4.397710 |
|          |            | C   | -2.505149 | -3.889030 | 0.186676  |
|          |            | O   | -3.090885 | -4.853640 | 0.286082  |
| <b>1</b> | <b>#15</b> | O 1 |           |           |           |
|          |            | Cu  | 0.513189  | 1.298199  | 0.000281  |
|          |            | Cu  | 0.866682  | -1.092989 | -0.002573 |
|          |            | Cu  | 2.796387  | 0.414719  | -0.003472 |
|          |            | Cu  | -1.755558 | 2.216726  | 0.005307  |
|          |            | Cu  | -1.380153 | -0.202891 | 0.003636  |
|          |            | Cu  | 0.005855  | -0.002404 | 2.294671  |
|          |            | Cu  | -0.005107 | 0.001209  | -2.293578 |
|          |            | Cu  | -1.040725 | -2.628096 | -0.000661 |
|          |            | C   | 1.187228  | 3.002079  | 0.000742  |

|             |                                      |     |           |           |           |
|-------------|--------------------------------------|-----|-----------|-----------|-----------|
|             |                                      | O   | 1.609328  | 4.068074  | 0.001115  |
|             |                                      | C   | 4.658200  | 0.689043  | -0.007607 |
|             |                                      | O   | 5.778570  | 0.853034  | -0.012007 |
|             |                                      | C   | -3.193002 | -0.470448 | 0.007370  |
|             |                                      | O   | -4.327220 | -0.637833 | 0.009743  |
|             |                                      | C   | -2.927438 | 3.689033  | 0.002101  |
|             |                                      | O   | -3.634197 | 4.573680  | -0.003681 |
|             |                                      | C   | 2.005808  | -2.528377 | -0.005782 |
|             |                                      | O   | 2.717893  | -3.426935 | -0.007696 |
|             |                                      | C   | -1.733695 | -4.377681 | -0.002133 |
|             |                                      | O   | -2.150610 | -5.430453 | -0.002993 |
|             |                                      | C   | -1.794192 | -0.274000 | 2.908611  |
|             |                                      | C   | -1.807788 | -0.266908 | -2.900846 |
|             |                                      | C   | 0.674062  | 1.691566  | 2.906417  |
|             |                                      | C   | 0.663638  | 1.695201  | -2.904821 |
|             |                                      | C   | 1.141224  | -1.428529 | 2.900807  |
|             |                                      | C   | 1.126272  | -1.425258 | -2.906615 |
|             |                                      | O   | -2.836103 | -0.432153 | 3.336373  |
|             |                                      | O   | 1.798862  | -2.254451 | 3.323818  |
|             |                                      | O   | 1.061053  | 2.672376  | 3.332797  |
|             |                                      | O   | 1.780960  | -2.251462 | -3.333648 |
|             |                                      | O   | -2.851727 | -0.422819 | -3.324446 |
|             |                                      | O   | 1.050882  | 2.675941  | -3.331152 |
| <b>2, 3</b> | <b>Cu<sub>5</sub> planar</b>         | O 2 |           |           |           |
|             |                                      | Cu  | 2.400123  | -0.848182 | -0.003618 |
|             |                                      | Cu  | 0.000064  | -0.831915 | -0.002211 |
|             |                                      | Cu  | 1.230425  | 1.264249  | 0.009205  |
|             |                                      | Cu  | -1.230628 | 1.264166  | -0.009188 |
|             |                                      | Cu  | -2.399984 | -0.848318 | 0.005812  |
| <b>2, 4</b> | <b>Cu<sub>5</sub>-3D</b>             | O 2 |           |           |           |
|             |                                      | Cu  | 2.036971  | 0.001381  | -0.040587 |
|             |                                      | Cu  | 0.002371  | 1.301657  | -0.621365 |
|             |                                      | Cu  | -0.001238 | -0.008061 | 1.335126  |
|             |                                      | Cu  | -2.037194 | 0.003482  | -0.041835 |
|             |                                      | Cu  | -0.000911 | -1.298459 | -0.631339 |
| <b>2, 5</b> | <b>Cu<sub>8</sub>-D<sub>2d</sub></b> | O 1 |           |           |           |
|             |                                      | Cu  | -0.520515 | 1.596124  | -0.015788 |
|             |                                      | Cu  | 0.519500  | -0.015855 | -1.588585 |
|             |                                      | Cu  | -1.887079 | -0.012439 | -1.291447 |
|             |                                      | Cu  | -1.888416 | 0.012149  | 1.291147  |
|             |                                      | Cu  | 0.518573  | 0.015604  | 1.589082  |
|             |                                      | Cu  | 1.888501  | 1.294323  | -0.012338 |
|             |                                      | Cu  | -0.520051 | -1.596376 | 0.014655  |
|             |                                      | Cu  | 1.889487  | -1.293529 | 0.013274  |
| <b>2</b>    | <b>Cu<sub>8</sub>-T<sub>d</sub></b>  | O 1 |           |           |           |
|             |                                      | Cu  | -0.700365 | -1.185445 | 0.658534  |
|             |                                      | Cu  | 0.952636  | -0.509425 | -1.077663 |
|             |                                      | Cu  | 1.709445  | -1.504427 | 1.037665  |
|             |                                      | Cu  | -1.567917 | 0.831874  | 1.762973  |
|             |                                      | Cu  | -1.038116 | 0.920519  | -0.634446 |
|             |                                      | Cu  | -1.295023 | -1.267195 | -1.724137 |

|          |                                     |                                  |
|----------|-------------------------------------|----------------------------------|
|          |                                     | Cu 0.786301 0.773870 1.054672    |
|          |                                     | Cu 1.153039 1.940229 -1.077600   |
| <b>3</b> | <b>Cu<sub>5</sub>-O<sub>2</sub></b> | Cu -2.412242 -1.166601 -0.001093 |
|          |                                     | Cu -0.000490 -1.088334 0.009931  |
|          |                                     | Cu -1.357724 0.947458 -0.006313  |
|          |                                     | Cu 1.359117 0.946972 0.006167    |
|          |                                     | Cu 2.410723 -1.168504 -0.008569  |
|          |                                     | O -0.663724 2.771551 -0.003146   |
|          |                                     | O 0.665958 2.771105 0.002704     |
| <b>3</b> | <b>#16</b>                          | O 2                              |
|          |                                     | Cu -1.872325 -1.451819 -0.884953 |
|          |                                     | Cu -1.288015 0.689446 0.167038   |
|          |                                     | Cu 0.358615 -1.177246 -0.126438  |
|          |                                     | Cu 1.381356 1.015350 -0.418180   |
|          |                                     | Cu 2.603782 -0.695764 0.648794   |
|          |                                     | O -0.935842 2.260252 -1.021780   |
|          |                                     | O 0.361029 2.471221 -1.199232    |
|          |                                     | C -1.898896 0.734145 1.938045    |
|          |                                     | O -2.290889 0.590538 2.992283    |
| <b>3</b> | <b>#17</b>                          | O 2                              |
|          |                                     | Cu -1.018111 2.477857 0.321905   |
|          |                                     | Cu -1.330682 0.187240 -0.311232  |
|          |                                     | Cu 0.911294 1.099154 -0.014158   |
|          |                                     | Cu 0.701423 -1.303049 0.410031   |
|          |                                     | Cu 2.727960 -0.406586 -0.454503  |
|          |                                     | O -1.916661 -2.084599 1.181432   |
|          |                                     | O -0.645722 -2.345668 1.306094   |
|          |                                     | C -2.317275 -1.263932 -1.024461  |
|          |                                     | O -2.920240 -2.069764 -1.545340  |
| <b>3</b> | <b>#18</b>                          | O 2                              |
|          |                                     | Cu 0.525748 2.699502 -0.243282   |
|          |                                     | Cu 1.309985 0.458363 0.122646    |
|          |                                     | Cu -1.083740 0.953195 0.001323   |
|          |                                     | Cu -0.475872 -1.409028 -0.238816 |
|          |                                     | Cu -2.695243 -0.785506 0.339078  |
|          |                                     | O 2.157456 -2.558991 -0.467467   |
|          |                                     | O 0.911129 -2.654121 -0.781278   |
|          |                                     | C 2.680451 -0.867916 0.469326    |
|          |                                     | O 3.690395 -1.083356 0.965814    |
| <b>3</b> | <b>#19</b>                          | O 2                              |
|          |                                     | Cu -0.779732 2.637684 -0.188888  |
|          |                                     | Cu -1.361812 0.309447 0.015725   |
|          |                                     | Cu 0.999530 1.041229 0.060593    |
|          |                                     | Cu 0.552939 -1.337836 -0.287199  |
|          |                                     | Cu 2.734947 -0.595775 0.318387   |
|          |                                     | O -1.926691 -2.567965 -0.157758  |
|          |                                     | O -0.788430 -2.507235 -0.928600  |
|          |                                     | C -2.354255 -1.346174 0.371475   |
|          |                                     | O -3.297970 -1.363634 1.102761   |
| <b>3</b> | <b>#20</b>                          | O 2                              |
|          |                                     | Cu -1.348246 2.271098 -0.003694  |

|          |            |                                  |
|----------|------------|----------------------------------|
|          |            | Cu -1.344745 -0.053615 -0.489416 |
|          |            | Cu 0.773406 1.101959 0.096571    |
|          |            | Cu 1.001244 -1.312740 -0.220739  |
|          |            | Cu 2.910785 -0.031610 0.306217   |
|          |            | O -1.583473 -2.522522 0.189756   |
|          |            | O -0.704692 -2.003787 -0.878144  |
|          |            | C -2.318699 -1.481470 0.577943   |
|          |            | O -3.195419 -1.522295 1.382526   |
| <b>3</b> | <b>#21</b> | O 2                              |
|          |            | Cu -1.268096 2.299116 -0.009982  |
|          |            | Cu -1.310657 -0.030444 -0.488904 |
|          |            | Cu 0.815305 1.083298 0.120137    |
|          |            | Cu 0.975312 -1.353071 -0.153158  |
|          |            | Cu 2.934760 -0.101910 0.259971   |
|          |            | O -1.796301 -2.538740 0.248159   |
|          |            | O -0.704876 -1.930626 -0.863959  |
|          |            | C -2.472192 -1.507269 0.525577   |
|          |            | O -3.426193 -1.276769 1.207384   |
| <b>3</b> | <b>#22</b> | O 2                              |
|          |            | Cu 1.610756 2.432770 0.150155    |
|          |            | Cu -0.439968 1.302894 -0.258918  |
|          |            | Cu 1.617652 -0.000153 0.079420   |
|          |            | Cu -0.440291 -1.302676 -0.258769 |
|          |            | Cu 1.610142 -2.433099 0.150171   |
|          |            | O -4.589757 -1.159006 0.279681   |
|          |            | O -1.750164 0.000285 -0.266323   |
|          |            | C -4.558597 0.000245 0.274665    |
|          |            | O -4.589933 1.159491 0.280683    |
| <b>3</b> | <b>#23</b> | O 2                              |
|          |            | Cu 2.434776 -0.966092 0.000503   |
|          |            | Cu -0.000184 -0.976925 -0.000579 |
|          |            | Cu 1.288530 1.115399 -0.000525   |
|          |            | Cu -1.288381 1.115660 -0.000426  |
|          |            | Cu -2.434819 -0.965992 0.000451  |
|          |            | O 0.000285 2.457570 0.002088     |
| <b>3</b> | <b>#24</b> | O 2                              |
|          |            | Cu 0.168097 1.729334 0.146827    |
|          |            | Cu -0.555343 -0.656969 0.539082  |
|          |            | Cu 2.569193 -0.233724 0.176486   |
|          |            | Cu -2.709077 -1.392135 -0.145911 |
|          |            | Cu -2.021805 0.915512 -0.567283  |
|          |            | O 1.065173 0.250453 0.972808     |
|          |            | C 4.113829 -0.718397 -0.586186   |
|          |            | O 5.089342 -1.023970 -1.074022   |
| <b>3</b> | <b>#25</b> | O 2                              |
|          |            | Cu 0.306927 1.683422 -0.056658   |
|          |            | Cu -0.386563 -0.712908 0.047883  |
|          |            | Cu 3.145132 -0.587187 -0.756758  |
|          |            | Cu -2.686846 -1.311808 0.004062  |
|          |            | Cu -2.046466 1.043928 -0.089462  |
|          |            | O 1.377250 0.064003 0.004007     |

|          |            |                                                                                                                                                                                                                                                                                        |
|----------|------------|----------------------------------------------------------------------------------------------------------------------------------------------------------------------------------------------------------------------------------------------------------------------------------------|
|          |            | C 2.774036 -0.353270 1.115327<br>O 2.588056 -0.217543 2.244126                                                                                                                                                                                                                         |
| <b>3</b> | <b>#26</b> | O 2<br>Cu 0.093264 1.687067 -0.000447<br>Cu -0.531722 -0.753066 0.000613<br>Cu 4.100661 -0.592293 -0.000030<br>Cu -2.852193 -1.349685 -0.000710<br>Cu -2.217272 0.985796 0.000612<br>O 2.003857 1.154562 -0.000642<br>C 2.252122 -0.078223 -0.000092<br>O 1.408382 -1.015489 0.000574  |
| <b>3</b> | <b>#27</b> | O 2<br>Cu -0.798796 1.213278 0.474271<br>Cu 0.681592 -0.984529 0.122922<br>Cu -3.133550 -0.207976 -0.776684<br>Cu 3.014881 -0.600313 -0.149260<br>Cu 1.476096 1.262482 -0.328360<br>O -1.135079 -1.737860 0.268755<br>C -1.918946 -0.803661 0.602949<br>O -1.921517 -0.135062 1.661060 |
| <b>3</b> | <b>#28</b> | O 2<br>Cu 0.284527 -1.956657 -0.000194<br>Cu -0.054600 0.514937 -0.000102<br>Cu 2.243644 -0.505720 0.000313<br>Cu -2.347111 1.437827 0.000115<br>Cu -1.950739 -0.899063 0.000028<br>O 1.261206 2.048264 -0.000332<br>C 2.403696 1.545907 -0.000131<br>O 3.549033 1.898752 -0.000151    |
| <b>3</b> | <b>#29</b> | O 2<br>Cu -1.321488 2.432765 0.128238<br>Cu 0.715445 1.283197 -0.271492<br>Cu 0.714531 -1.283709 -0.271444<br>Cu -1.323208 -2.431854 0.128224<br>Cu -1.335586 0.000464 0.143754<br>O 2.049890 -0.000741 -0.653654<br>C 3.487027 -0.001171 0.842503<br>O 4.579698 -0.001506 0.539136    |
| <b>3</b> | <b>#30</b> | O 2<br>Cu 0.887504 2.594052 0.000082<br>Cu 1.468027 0.305691 -0.000278<br>Cu -0.547263 -1.476087 -0.000230<br>Cu -2.743423 -0.632665 0.000149<br>Cu -0.894579 0.947631 0.000138<br>O 1.416055 -1.700136 -0.000550<br>C 2.301578 -2.638509 0.000233<br>O 3.490543 -2.623486 0.000878    |
| <b>3</b> | <b>#31</b> | O 2<br>Cu -2.827296 -1.114088 -0.004527<br>Cu -1.253199 0.697539 -0.002164<br>Cu 1.138607 0.317244 0.005133                                                                                                                                                                            |



|   |                                       |                                                                                                                                                                                                                                                                                                                        |
|---|---------------------------------------|------------------------------------------------------------------------------------------------------------------------------------------------------------------------------------------------------------------------------------------------------------------------------------------------------------------------|
|   |                                       | Cu 0.243694 2.566897 -0.000151<br>Cu -0.450010 -1.586874 0.006195<br>O 3.568377 -0.156051 -0.006190<br>C 4.152108 -1.163354 -0.005924<br>O 4.729779 -2.164036 -0.005632                                                                                                                                                |
| 4 | 3D-Cu <sub>5</sub> -O <sub>2</sub>    | O 2<br>Cu -2.086217 -0.392718 -0.004224<br>Cu -0.005425 0.508761 1.197430<br>Cu 0.006123 0.509013 -1.196657<br>Cu 2.087713 -0.388278 0.002663<br>Cu 0.000892 -1.597537 0.000638<br>O -0.007106 2.466197 0.657040<br>O -0.004082 2.466555 -0.656499                                                                     |
| 4 | #32                                   | O 2<br>Cu -0.201462 -2.075714 -0.407636<br>Cu 0.845523 0.001949 0.769038<br>Cu -1.547297 -0.003325 0.165817<br>Cu -0.210016 2.074914 -0.408054<br>Cu 0.043035 0.000055 -1.602928<br>O -0.319307 0.000064 2.433558<br>O -1.613582 -0.002643 2.168804<br>C 2.681133 0.004918 0.547213<br>O 3.801574 0.006575 0.365871    |
| 4 | #33                                   | O 2<br>Cu 0.042412 -2.055929 -0.056253<br>Cu 0.455060 0.221407 -1.064272<br>Cu -0.035746 0.079169 1.226481<br>Cu -1.262262 1.810021 -0.040396<br>Cu -1.834189 -0.533648 -0.278270<br>O 2.748916 0.468678 0.807617<br>O 1.764182 0.280643 1.737236<br>C 2.351299 0.462397 -0.593962<br>O 3.274303 0.640181 -1.328308    |
| 4 | 3D-Cu <sub>5</sub> -O <sub>2</sub> -h | O 2<br>Cu 1.918322 0.672634 -0.062891<br>Cu -0.023961 -0.440069 1.252132<br>Cu -0.193553 -0.808838 -1.150695<br>Cu -2.184897 -0.113623 0.144151<br>Cu -0.342916 1.516128 -0.237550<br>O 1.748703 -1.115069 0.674169<br>O 1.249192 -1.880023 -0.475324                                                                  |
| 4 | #34                                   | O 2<br>Cu 1.721188 -0.945611 -0.699236<br>Cu 0.846405 1.099024 0.681874<br>Cu -0.641126 -0.881308 0.575338<br>Cu -1.436262 1.609597 0.166581<br>Cu -0.011219 0.514106 -1.524558<br>O 2.052135 -0.497961 1.162556<br>O 0.790130 -0.664622 1.890862<br>C -2.101773 -1.884287 0.107642<br>O -3.002260 -2.484007 -0.234144 |

|   |     |                                                                                                                                                                                                                                                                                                                        |
|---|-----|------------------------------------------------------------------------------------------------------------------------------------------------------------------------------------------------------------------------------------------------------------------------------------------------------------------------|
| 4 | #35 | O 2<br>Cu 1.148391 1.532889 -0.238374<br>Cu -0.171466 -0.153066 1.306329<br>Cu 0.156776 -0.625323 -1.066662<br>Cu -2.036999 -1.072485 0.092319<br>Cu -1.267957 1.253073 -0.416973<br>O 1.791669 0.504751 1.315210<br>O 1.803767 -0.913198 1.157039<br>C 1.907356 -1.341427 -0.609821<br>O 2.844849 -1.975175 -0.842701 |
| 4 | #36 | O 2<br>Cu 1.061847 1.530609 -0.277286<br>Cu -0.222970 -0.073544 1.330449<br>Cu 0.225963 -0.742883 -0.941961<br>Cu -2.080279 -1.076948 0.145806<br>Cu -1.354882 1.149567 -0.541427<br>O 1.683733 0.500370 1.333176<br>O 2.528289 -0.558027 0.829174<br>C 2.084242 -1.133779 -0.365060<br>O 2.817214 -1.944163 -0.857534 |
| 4 | #37 | O 2<br>Cu 1.221813 1.317468 -0.470776<br>Cu -0.372979 0.287364 1.325685<br>Cu 0.242783 -0.965596 -0.734397<br>Cu -2.138857 -0.992577 0.201502<br>Cu -1.250429 1.037615 -0.794278<br>O 1.406391 0.908404 1.399927<br>O 2.441085 -0.579962 1.036938<br>C 2.140613 -1.137849 -0.128076<br>O 2.876113 -1.955549 -0.628852  |
| 4 | #38 | O 2<br>Cu 0.555482 -2.070817 -0.267132<br>Cu 1.216585 0.007728 1.252682<br>Cu -0.850337 0.119340 0.055489<br>Cu 0.864941 2.079608 0.001051<br>Cu 1.321865 0.014653 -1.248244<br>O -0.203301 -1.307284 1.265340<br>O -5.088424 -0.055467 0.122035<br>C -4.026269 0.272735 -0.184516<br>O -2.957021 0.612594 -0.501683   |
| 4 | #39 | O 2<br>Cu -2.029685 0.330659 0.000712<br>Cu 0.077347 -0.739640 1.190191<br>Cu 0.111188 1.480469 0.001881<br>Cu 2.130268 0.051052 -0.000714<br>Cu 0.074903 -0.735974 -1.192078<br>O -1.319580 -1.401299 0.000026                                                                                                        |
| 4 | #40 | O 2<br>Cu -1.813366 0.432385 0.000273<br>Cu 0.733965 0.606717 1.215927<br>Cu 0.736669 0.609446 -1.214844                                                                                                                                                                                                               |

|   |     |                                                                                                                                                                                                                                                                                                                         |
|---|-----|-------------------------------------------------------------------------------------------------------------------------------------------------------------------------------------------------------------------------------------------------------------------------------------------------------------------------|
|   |     | Cu 2.424348 -0.660443 -0.000246<br>Cu 0.024130 -1.441282 -0.000354<br>O -0.654759 1.890962 0.754764<br>O -0.654832 1.890685 -0.753887<br>C -3.166002 -0.749006 -0.001301<br>O -3.949240 -1.577126 -0.002643                                                                                                             |
| 4 | #41 | O 2<br>Cu -1.683037 -1.117866 0.028417<br>Cu 0.470040 -0.441384 1.275590<br>Cu 0.312213 1.402539 -0.325048<br>Cu 2.415766 0.275955 -0.147651<br>Cu 0.565488 -1.128021 -1.018919<br>O -1.206794 0.460230 1.671962<br>O -1.449073 1.416931 0.614519<br>C -2.458989 0.599533 -0.522544<br>O -3.041597 1.330002 -1.214481   |
| 4 | #42 | O 2<br>Cu -1.757079 -1.136953 0.076207<br>Cu 0.349887 -0.298117 1.301805<br>Cu 0.428086 1.388452 -0.474554<br>Cu 2.412878 0.128348 -0.111345<br>Cu 0.514060 -1.238069 -0.882824<br>O -1.132999 0.907355 1.660131<br>O -1.439418 1.552018 0.396279<br>C -2.253494 0.675530 -0.473186<br>O -2.798354 1.225711 -1.372695   |
| 4 | #43 | O 2<br>Cu -1.939457 -0.988955 -0.288069<br>Cu 0.394068 -1.221620 0.735728<br>Cu 0.934664 1.243894 0.775582<br>Cu 2.276171 -0.295631 -0.525726<br>Cu -0.064616 0.244855 -1.241194<br>O -1.249648 -0.471950 1.533285<br>O -1.080344 1.139404 1.148066<br>C -1.520656 1.250860 -0.259270<br>O -2.332519 2.082681 -0.516062 |
| 4 | #44 | O 2<br>Cu -2.049558 -0.650272 0.034237<br>Cu 0.507881 -1.348421 0.477784<br>Cu 0.850772 1.136134 0.901716<br>Cu 2.389636 -0.136557 -0.418629<br>Cu -0.094615 0.303137 -1.176676<br>O -1.132818 -2.116168 0.465131<br>O -0.839359 2.284556 0.538259<br>C -1.498119 1.481714 -0.156577<br>O -2.719155 1.243253 -0.227770  |
| 4 | #45 | O 2<br>Cu -1.343319 1.329824 -0.200600<br>Cu 0.001553 -0.661264 -1.077304<br>Cu 0.169128 -0.268431 1.312276<br>Cu 2.198844 -0.787083 0.068531                                                                                                                                                                           |

|   |                                 |                                                                                                                                                                                                                                                                                         |
|---|---------------------------------|-----------------------------------------------------------------------------------------------------------------------------------------------------------------------------------------------------------------------------------------------------------------------------------------|
|   |                                 | Cu 1.097309 1.389282 -0.296207<br>O -2.357404 -0.217559 0.486957<br>O -1.659392 -0.590639 1.718235<br>C -2.608063 -1.547726 -0.393760<br>O -1.724898 -1.664444 -1.209143                                                                                                                |
| 4 | #46                             | O 2<br>Cu 1.773186 -0.554787 -0.000072<br>Cu -0.690980 -0.726949 1.183821<br>Cu -0.691027 -0.727239 -1.183657<br>Cu -2.350187 0.674970 -0.000082<br>Cu 0.031314 1.384260 -0.000064<br>O 0.440777 -1.794590 0.000232<br>C 3.248933 0.495229 -0.000048<br>O 4.110413 1.240993 -0.000001   |
| 4 | #47                             | O 2<br>Cu -1.546064 1.067124 -0.000006<br>Cu 0.147861 -0.653548 -1.184308<br>Cu 0.147858 -0.653530 1.184314<br>Cu 2.347576 -0.507347 0.000002<br>Cu 0.882990 1.456734 -0.000005<br>O -1.260494 -1.243796 0.000005<br>C -2.866263 -0.348143 0.000000<br>O -3.768108 -1.066793 0.000004   |
| 4 | #48                             | O 2<br>Cu -1.671746 1.127588 0.102595<br>Cu -0.172669 -0.219854 -1.177267<br>Cu 0.507923 -0.994663 1.022710<br>Cu 2.244741 -0.327679 -0.485171<br>Cu 0.720875 1.414314 0.471637<br>O -1.396910 -1.621954 0.907685<br>C -1.980604 -1.049344 -0.052595<br>O -3.023211 -1.214971 -0.630819 |
| 4 | #49                             | O 2<br>Cu 1.300195 1.402783 0.000003<br>Cu -0.051115 -0.546369 1.184311<br>Cu -0.051120 -0.546346 -1.184323<br>Cu -2.200141 -0.905348 -0.000002<br>Cu -1.121664 1.366082 0.000011<br>O 1.601549 -0.544821 -0.000005<br>C 2.887268 -1.578360 -0.000001<br>O 3.931939 -1.065567 0.000003  |
| 4 | #50                             | O 2<br>Cu -0.026431 2.029302 -0.001300<br>Cu 1.083623 0.266676 1.330085<br>Cu 1.265673 0.314489 -1.227183<br>Cu 1.304735 -1.813787 0.020955<br>Cu -0.699574 -0.354867 -0.100738<br>O -2.764758 -0.949824 -0.145510<br>C -3.862496 -0.576334 -0.027448<br>O -4.952465 -0.219501 0.087002 |
| 5 | Cu <sub>8</sub> -O <sub>2</sub> | O 1                                                                                                                                                                                                                                                                                     |

|          |            |                                  |
|----------|------------|----------------------------------|
|          |            | Cu -1.306410 -1.679114 -0.106332 |
|          |            | Cu 1.235577 0.506450 1.109948    |
|          |            | Cu -1.235569 0.506466 1.109947   |
|          |            | Cu -2.447017 0.207331 -1.046127  |
|          |            | Cu 0.000001 0.288310 -1.031324   |
|          |            | Cu 1.306391 -1.679123 -0.106337  |
|          |            | Cu 0.000014 2.444156 0.188405    |
|          |            | Cu 2.447018 0.207312 -1.046127   |
|          |            | O -0.000005 -0.794851 2.061168   |
|          |            | O -0.000010 -2.111627 1.302636   |
| <b>5</b> | <b>#51</b> | 0 1                              |
|          |            | Cu -1.972220 -1.291699 0.205991  |
|          |            | Cu 1.559470 -0.161710 0.858240   |
|          |            | Cu -0.830750 0.677894 1.291124   |
|          |            | Cu -2.843726 0.917423 -0.144380  |
|          |            | Cu -0.649417 0.391360 -1.105330  |
|          |            | Cu 0.461308 -1.811443 -0.756158  |
|          |            | Cu 0.757018 2.081724 -0.013681   |
|          |            | Cu 1.664424 0.082378 -1.654215   |
|          |            | O 0.072512 -1.030660 1.829075    |
|          |            | O -0.410431 -2.190642 0.983732   |
|          |            | C 3.389356 -0.059433 1.074621    |
|          |            | O 4.516261 0.054394 1.160460     |
| <b>5</b> | <b>#52</b> | 0 1                              |
|          |            | Cu 1.326130 1.456550 -0.949089   |
|          |            | Cu -1.429214 -0.382959 0.881247  |
|          |            | Cu 1.013289 0.258388 1.240196    |
|          |            | Cu 2.671556 -0.456319 -0.482321  |
|          |            | Cu 0.291227 -0.852187 -0.864355  |
|          |            | Cu -1.297667 1.124158 -1.028328  |
|          |            | Cu 0.302278 -2.101846 1.247838   |
|          |            | Cu -2.031112 -1.141023 -1.456852 |
|          |            | O -0.043049 2.132102 1.273845    |
|          |            | O -0.157175 2.510123 -0.149970   |
|          |            | C -1.363628 1.411217 1.733088    |
|          |            | O -1.845576 1.894597 2.693591    |
| <b>5</b> | <b>#53</b> | 0 1                              |
|          |            | Cu 0.254405 1.771273 -0.051972   |
|          |            | Cu -0.908338 -0.397661 0.905203  |
|          |            | Cu 1.497966 0.039346 1.353393    |
|          |            | Cu 2.531685 1.250449 -0.577416   |
|          |            | Cu 0.824287 -0.478618 -0.944337  |
|          |            | Cu -1.493694 0.400709 -1.411493  |
|          |            | Cu 0.690891 -2.233245 0.846803   |
|          |            | Cu -1.022061 -1.976846 -1.117788 |
|          |            | O -2.447407 2.101121 0.653513    |
|          |            | O -1.607988 2.208642 -0.511902   |
|          |            | C -2.214045 0.982226 1.426321    |
|          |            | O -2.893954 0.842717 2.404971    |
| <b>5</b> | <b>#54</b> | 0 1                              |
|          |            | Cu -0.663785 -1.714773 -0.365986 |

|          |            |                                  |
|----------|------------|----------------------------------|
|          |            | Cu 1.109679 0.070724 0.804181    |
|          |            | Cu -1.252846 -0.065695 1.497014  |
|          |            | Cu -2.811033 -0.611987 -0.387762 |
|          |            | Cu -0.800464 0.695365 -0.812695  |
|          |            | Cu 1.273812 -0.446689 -1.656934  |
|          |            | Cu -0.155382 2.122647 1.106147   |
|          |            | Cu 1.198420 1.957026 -1.062304   |
|          |            | O 2.135803 -2.545016 0.592054    |
|          |            | O 1.090434 -2.172844 -0.862262   |
|          |            | C 2.163204 -1.568877 1.381607    |
|          |            | O 2.769656 -1.379473 2.417980    |
| <b>5</b> | <b>#55</b> | O 1                              |
|          |            | Cu -0.189481 -1.758878 -0.414978 |
|          |            | Cu 1.016730 0.218279 0.670361    |
|          |            | Cu -1.244409 -0.498996 1.541733  |
|          |            | Cu -2.582799 -1.505663 -0.333980 |
|          |            | Cu -1.176815 0.507469 -0.680427  |
|          |            | Cu 1.017545 0.107473 -1.813598   |
|          |            | Cu -0.584922 1.858211 1.414373   |
|          |            | Cu 0.351135 2.313595 -0.979460   |
|          |            | O 4.406108 -2.064771 0.431394    |
|          |            | O 1.606616 -1.223453 -0.560582   |
|          |            | C 3.862705 -1.197429 0.967248    |
|          |            | O 3.389931 -0.314105 1.564165    |
| <b>5</b> | <b>#56</b> | O 1                              |
|          |            | Cu -0.168180 -2.034710 0.120362  |
|          |            | Cu 0.212878 1.279092 1.099018    |
|          |            | Cu -1.739928 -0.241342 0.945861  |
|          |            | Cu -2.071759 -1.465847 -1.207283 |
|          |            | Cu -0.293763 0.196892 -1.024397  |
|          |            | Cu 2.010027 -0.478286 0.294183   |
|          |            | Cu -1.847415 1.943680 -0.158303  |
|          |            | Cu 1.593300 1.708005 -0.851234   |
|          |            | O -0.112142 -0.376202 2.177253   |
|          |            | O 0.882143 -1.363779 1.637693    |
|          |            | C 3.741270 -0.841010 -0.300265   |
|          |            | O 4.779096 -0.918889 -0.755754   |
| <b>5</b> | <b>#57</b> | O 1                              |
|          |            | Cu 0.576232 -1.882654 -0.454566  |
|          |            | Cu 0.439463 1.061425 1.141341    |
|          |            | Cu -1.067345 -0.877399 1.214324  |
|          |            | Cu -1.803658 -1.918418 -0.916720 |
|          |            | Cu -0.649372 0.184423 -1.009539  |
|          |            | Cu 1.821875 0.566273 -0.845467   |
|          |            | Cu -1.948615 1.422083 0.718718   |
|          |            | Cu 0.130501 2.409870 -0.879632   |
|          |            | O 0.890172 -0.723863 1.892067    |
|          |            | O 1.800353 -1.537953 1.082483    |
|          |            | C 3.034450 -0.492806 0.290697    |
|          |            | O 4.099470 -0.868890 0.546767    |
| <b>5</b> | <b>#58</b> | O 1                              |

|          |            |                                  |
|----------|------------|----------------------------------|
|          |            | Cu -1.435461 1.193604 -0.594022  |
|          |            | Cu 0.419816 -1.261836 1.101658   |
|          |            | Cu 0.418058 1.262340 1.101628    |
|          |            | Cu 0.579933 2.424896 -1.113779   |
|          |            | Cu 0.774321 0.000779 -0.976561   |
|          |            | Cu -1.433177 -1.195495 -0.594551 |
|          |            | Cu 2.523238 0.001585 0.780118    |
|          |            | Cu 0.583897 -2.423667 -1.114197  |
|          |            | O -0.769728 -0.000738 2.149844   |
|          |            | O -2.214060 -0.002191 1.969361   |
|          |            | C -2.644478 -0.002221 0.671184   |
|          |            | O -3.843870 -0.003400 0.487588   |
| <b>5</b> | <b>#59</b> | 0 1                              |
|          |            | Cu -1.448686 1.204735 -0.545046  |
|          |            | Cu 0.440311 -1.275976 1.105581   |
|          |            | Cu 0.440541 1.275905 1.105579    |
|          |            | Cu 0.621972 2.422996 -1.085740   |
|          |            | Cu 0.714138 -0.000075 -0.994450  |
|          |            | Cu -1.448933 -1.204478 -0.544972 |
|          |            | Cu 2.509134 -0.000217 0.716432   |
|          |            | Cu 0.621477 -2.423129 -1.085745  |
|          |            | O -0.601497 0.000059 2.093567    |
|          |            | O -2.356241 0.000258 1.916792    |
|          |            | C -2.718455 0.000243 0.685622    |
|          |            | O -3.884503 0.000364 0.290734    |
| <b>5</b> | <b>#60</b> | 0 1                              |
|          |            | Cu 0.045375 -1.959546 -0.994615  |
|          |            | Cu 0.155453 1.608732 0.943659    |
|          |            | Cu -0.183109 -0.897902 1.148685  |
|          |            | Cu -2.479995 -1.266649 -0.569641 |
|          |            | Cu -0.833248 0.406249 -0.985620  |
|          |            | Cu 1.521909 -0.035738 -0.493172  |
|          |            | Cu -2.229350 0.497628 1.097291   |
|          |            | Cu 0.797528 2.239884 -1.295135   |
|          |            | O -0.712134 0.598464 2.278803    |
|          |            | O 3.900280 -0.267104 -0.001231   |
|          |            | C 4.485162 -1.000980 0.688359    |
|          |            | O 5.067693 -1.729006 1.369642    |
| <b>5</b> | <b>#61</b> | 0 1                              |
|          |            | Cu 1.005122 2.067020 0.237400    |
|          |            | Cu -1.317177 -1.258234 0.556425  |
|          |            | Cu 0.756628 -0.040741 1.377482   |
|          |            | Cu 2.298246 0.137971 -0.950210   |
|          |            | Cu -0.082245 0.151858 -1.077600  |
|          |            | Cu -1.271318 1.294133 0.729317   |
|          |            | Cu 1.113885 -1.884902 -0.236915  |
|          |            | Cu -2.560181 0.060463 -1.037176  |
|          |            | O 0.206770 -1.912431 1.454633    |
| <b>5</b> | <b>#62</b> | 0 1                              |
|          |            | 6 0 3.912856 -0.002187 0.263602  |
|          |            | O 4.708733 -0.001572 1.097322    |

|          |            |                                  |
|----------|------------|----------------------------------|
|          |            | O 2.276570 -0.001883 0.562011    |
|          |            | O 1.045664 -0.000883 1.778858    |
|          |            | Cu -0.369916 -1.234181 1.172943  |
|          |            | Cu -2.513855 0.001862 0.849228   |
|          |            | Cu -0.829755 0.000559 -0.936074  |
|          |            | Cu -0.791508 2.425740 -0.952775  |
|          |            | Cu 1.322758 1.294117 -0.678428   |
|          |            | Cu -0.367975 1.234730 1.172843   |
|          |            | Cu 1.320714 -1.296517 -0.678202  |
|          |            | Cu -0.795459 -2.424660 -0.952541 |
| <b>5</b> | <b>#63</b> | 0 1                              |
|          |            | 6 0 3.954854 -1.156151 0.720065  |
|          |            | O 4.322475 -1.300428 1.804134    |
|          |            | O 3.684644 -1.044127 -0.411647   |
|          |            | O 1.484823 -0.278321 1.314472    |
|          |            | Cu -0.250692 -1.015483 1.018495  |
|          |            | Cu -1.964952 0.879560 1.368755   |
|          |            | Cu -0.957043 0.595123 -0.822192  |
|          |            | Cu 0.732867 2.168568 -1.346030   |
|          |            | Cu 1.421652 -0.187979 -0.690438  |
|          |            | Cu 0.525777 1.376965 1.038221    |
|          |            | Cu -0.488169 -1.697481 -1.459625 |
|          |            | Cu -2.456151 -1.156516 -0.002912 |
| <b>5</b> | <b>#64</b> | 0 1                              |
|          |            | 8 0 -0.920508 0.004928 2.144485  |
|          |            | Cu 0.818302 -0.002753 1.336738   |
|          |            | Cu 0.966803 -2.050867 -0.227322  |
|          |            | Cu 0.004101 0.001606 -1.083676   |
|          |            | Cu -2.359090 0.001602 -1.236185  |
|          |            | Cu -1.268336 1.246832 0.686845   |
|          |            | Cu -1.276230 -1.237960 0.690291  |
|          |            | Cu 0.981090 2.047335 -0.228267   |
|          |            | Cu 2.387295 -0.007154 -0.530006  |
| <b>5</b> | <b>#65</b> | 0 1                              |
|          |            | Cu -0.432081 1.204361 -1.202320  |
|          |            | Cu 0.194406 -1.285038 1.275700   |
|          |            | Cu -2.050809 0.008995 0.555846   |
|          |            | Cu 1.630764 2.423363 -0.287443   |
|          |            | Cu 1.553438 -0.006872 -0.336127  |
|          |            | Cu -0.443054 -1.199150 -1.202209 |
|          |            | Cu 0.206647 1.283993 1.275500    |
|          |            | Cu 1.607578 -2.437937 -0.286976  |
|          |            | O -0.955397 0.005126 2.063734    |
|          |            | C -3.627229 0.013171 -0.361734   |
|          |            | O -4.541658 0.015024 -1.038330   |
| <b>5</b> | <b>#66</b> | 0 1                              |
|          |            | Cu 0.270740 -1.224527 1.427127   |
|          |            | Cu -0.490350 1.274219 -1.021763  |
|          |            | Cu -1.793141 0.000040 0.982517   |
|          |            | Cu 1.550359 -2.431483 -0.389207  |



|   |     |                                                                                                                                                                                                                                                                                                                                                                                                |
|---|-----|------------------------------------------------------------------------------------------------------------------------------------------------------------------------------------------------------------------------------------------------------------------------------------------------------------------------------------------------------------------------------------------------|
|   |     | Cu 1.509951 -0.000066 -0.367555<br>Cu 0.270782 1.224527 1.427100<br>Cu -0.490493 -1.274175 -1.021778<br>Cu 1.550590 2.431352 -0.389193<br>O -1.804453 0.000101 -1.456914<br>C -3.331394 0.000143 -0.176902<br>O -4.318837 0.000208 -0.756679                                                                                                                                                   |
| 5 | #67 | O 1<br>Cu 1.212154 0.395032 1.441182<br>Cu -1.289540 -0.584805 -0.952253<br>Cu 0.000160 -1.742529 1.145430<br>Cu 2.446504 1.457422 -0.508111<br>Cu -0.000135 1.475822 -0.412712<br>Cu -1.212226 0.394811 1.441180<br>Cu 1.289643 -0.584576 -0.952251<br>Cu -2.446771 1.456982 -0.508106<br>O 0.000179 -1.996022 -1.527441<br>C 0.000266 -2.880632 -0.476900<br>O 0.000383 -4.065581 -0.631933  |
| 5 | #68 | O 1<br>Cu 0.327388 -1.215714 1.370477<br>Cu -0.226348 1.211813 -1.171212<br>Cu -1.637983 -0.013686 0.458227<br>Cu 1.776012 -2.386603 -0.268694<br>Cu 1.727017 0.009919 -0.253485<br>Cu 0.311085 1.212140 1.373849<br>Cu -0.210333 -1.214206 -1.175755<br>Cu 1.745347 2.406794 -0.260981<br>O -5.886793 0.016290 -0.869517<br>C -5.027223 -0.013759 -0.097304<br>O -4.161960 -0.043877 0.679951 |
| 5 | #69 | O 1<br>Cu -0.850137 2.311726 -0.134806<br>Cu -0.580293 -1.632982 0.739720<br>Cu 0.134400 0.715537 1.337964<br>Cu 1.528055 1.526694 -0.708404<br>Cu -0.246970 0.001075 -1.075068<br>Cu -2.181075 0.337041 0.450778<br>Cu 2.043285 -0.794902 0.446113<br>Cu -2.063833 -1.647686 -1.150243<br>O 0.832564 -1.014900 1.839001<br>C 3.587371 -1.053776 -0.482260<br>O 4.511964 -1.154596 -1.136755   |
| 5 | #70 | O 1<br>Cu -1.105181 2.157077 0.568856<br>Cu -0.045624 -1.758856 0.388079<br>Cu 0.559482 0.540909 1.213021<br>Cu 1.010130 2.022443 -0.908369<br>Cu -0.537912 0.222839 -1.056049<br>Cu -1.894234 -0.129305 0.954477<br>Cu 1.909768 -0.256878 -0.849406                                                                                                                                           |

|   |     |                                                                                                                                                                                                                                                                                                                                                                                             |
|---|-----|---------------------------------------------------------------------------------------------------------------------------------------------------------------------------------------------------------------------------------------------------------------------------------------------------------------------------------------------------------------------------------------------|
|   |     | Cu -2.016420 -1.734274 -1.000696<br>O 1.443801 -1.149753 1.347846<br>C 3.102534 -1.236581 0.315758<br>O 3.914267 -1.779644 0.916900                                                                                                                                                                                                                                                         |
| 5 | #71 | O 1<br>Cu -0.939432 2.177892 0.645654<br>Cu -0.098472 -1.766807 0.301167<br>Cu 0.605148 0.468701 1.251190<br>Cu 1.077454 2.003940 -0.930417<br>Cu -0.534740 0.294400 -1.057269<br>Cu -1.856249 -0.066542 1.001979<br>Cu 1.904720 -0.348530 -0.951872<br>Cu -2.074636 -1.580155 -1.045959<br>O 1.465467 -1.342630 1.475842<br>C 2.544305 -1.383231 0.607891<br>O 3.572551 -1.907952 0.915775 |
| 5 | #72 | O 1<br>Cu -1.862503 -1.632231 0.588624<br>Cu 1.709842 0.831567 0.493727<br>Cu -0.742427 0.333331 1.339961<br>Cu -2.586869 0.556509 -0.607983<br>Cu -0.432780 -0.306618 -1.133253<br>Cu 0.596458 -1.654955 0.612876<br>Cu -0.642167 2.047805 -0.457643<br>Cu 1.850242 -0.934316 -1.401980<br>O 0.344920 1.913427 1.174552<br>C 3.532158 0.578346 0.509863<br>O 4.655449 0.403853 0.493608    |
| 5 | #73 | O 1<br>Cu -1.991217 -1.039254 1.037075<br>Cu 1.784118 0.159908 -0.079655<br>Cu -0.452674 0.780301 1.190041<br>Cu -2.347272 0.803644 -0.755728<br>Cu -0.441461 -0.602611 -0.997734<br>Cu 0.392986 -1.609498 1.074921<br>Cu -0.148107 1.865279 -1.020259<br>Cu 1.551435 -1.975372 -1.145218<br>O 0.806897 2.114593 0.614576<br>C 2.618067 1.668934 0.792136<br>O 3.218747 2.497514 1.316337   |
| 5 | #74 | O 1<br>Cu 2.231334 0.500613 1.183554<br>Cu -1.488260 0.080770 -0.296603<br>Cu 0.232926 -0.943266 1.147226<br>Cu 2.298394 -1.391177 -0.428974<br>Cu 0.893123 0.463322 -0.906460<br>Cu -0.045583 1.485494 1.149890<br>Cu -0.078694 -1.794870 -1.128565<br>Cu -0.610327 2.283980 -1.181834<br>O -3.953436 -0.179456 -0.096674<br>C -4.525868 -0.904850 0.611136                                |

|   |                           |     |           |           |           |
|---|---------------------------|-----|-----------|-----------|-----------|
|   |                           | O   | -5.096473 | -1.624547 | 1.312225  |
| 5 | #75                       | O 1 |           |           |           |
|   |                           | Cu  | 1.924131  | 1.250740  | 0.934849  |
|   |                           | Cu  | -1.715647 | -0.342927 | -0.008727 |
|   |                           | Cu  | 0.539983  | -0.678419 | 1.230684  |
|   |                           | Cu  | 2.374353  | -0.676844 | -0.740064 |
|   |                           | Cu  | 0.372617  | 0.576382  | -1.039136 |
|   |                           | Cu  | -0.496237 | 1.623467  | 1.001753  |
|   |                           | Cu  | 0.274112  | -1.912347 | -0.949647 |
|   |                           | Cu  | -1.749863 | 1.767859  | -1.173207 |
|   |                           | O   | -0.742422 | -2.051856 | 0.692696  |
|   |                           | C   | -2.284933 | -2.647266 | 1.275965  |
|   |                           | O   | -3.066380 | -1.791375 | 1.045493  |
| 6 | $\text{Cu}_5(\text{O})_2$ | O 2 |           |           |           |
|   |                           | Cu  | 2.070914  | -0.025849 | -0.064927 |
|   |                           | Cu  | -0.244897 | -0.873890 | -1.135759 |
|   |                           | Cu  | -0.141256 | 1.417225  | -0.058905 |
|   |                           | Cu  | -2.214261 | 0.194204  | -0.027985 |
|   |                           | Cu  | -0.236129 | -0.745025 | 1.233146  |
|   |                           | O   | 1.115216  | -1.586184 | 0.087483  |
|   |                           | O   | 1.660190  | 1.707025  | 0.109820  |
| 6 | #76                       | O 2 |           |           |           |
|   |                           | Cu  | -0.109720 | 1.519196  | 0.000588  |
|   |                           | Cu  | 0.488355  | -0.925172 | 0.003482  |
|   |                           | Cu  | 2.287918  | 0.784896  | -0.002237 |
|   |                           | Cu  | 2.788779  | -1.554905 | -0.001660 |
|   |                           | Cu  | -2.937241 | -0.228183 | 0.000557  |
|   |                           | O   | -1.191409 | 0.025579  | 0.003864  |
|   |                           | O   | 1.419288  | 2.464106  | 0.000604  |
|   |                           | C   | -4.706118 | -0.493376 | -0.002806 |
|   |                           | O   | -5.826370 | -0.654541 | -0.005009 |
| 6 | #77                       | O 2 |           |           |           |
|   |                           | Cu  | 0.488123  | 1.377652  | 0.115148  |
|   |                           | Cu  | -0.434549 | -0.955999 | -0.064076 |
|   |                           | Cu  | 3.337690  | -0.246971 | -0.750800 |
|   |                           | Cu  | -2.800619 | -1.286862 | -0.152914 |
|   |                           | Cu  | -1.999166 | 0.960734  | -0.011602 |
|   |                           | O   | 1.391417  | -0.254689 | -0.007286 |
|   |                           | C   | 2.800307  | -0.748501 | 1.016310  |
|   |                           | O   | 2.545399  | -1.110330 | 2.080430  |
|   |                           | O   | -0.931154 | 2.475387  | 0.297509  |
| 6 | #78                       | O 2 |           |           |           |
|   |                           | Cu  | 0.329851  | 1.790882  | -0.000146 |
|   |                           | Cu  | -0.468440 | -0.803106 | 0.000074  |
|   |                           | Cu  | 4.166907  | -0.684624 | 0.000030  |
|   |                           | Cu  | -2.728373 | -1.607270 | -0.000140 |
|   |                           | Cu  | -2.372080 | 0.732547  | 0.000130  |
|   |                           | O   | 2.081201  | 1.068890  | -0.000188 |
|   |                           | C   | 2.322126  | -0.171169 | 0.000010  |
|   |                           | O   | 1.459591  | -1.088574 | 0.000164  |
|   |                           | O   | -1.395898 | 2.220006  | 0.000205  |

|   |     |                                                                                                                                                                                                                                                                                                                          |
|---|-----|--------------------------------------------------------------------------------------------------------------------------------------------------------------------------------------------------------------------------------------------------------------------------------------------------------------------------|
| 6 | #79 | O 2<br>Cu -1.117941 1.252655 0.500422<br>Cu 0.838648 -1.214405 0.245065<br>Cu -2.999614 -0.503748 -0.859730<br>Cu 3.062704 -0.545707 -0.225737<br>Cu 1.374585 1.128305 -0.267714<br>O -1.010779 -1.906506 0.395531<br>C -1.815159 -0.962872 0.594548<br>O -1.868458 -0.208327 1.608692<br>O 0.041475 2.412498 -0.247241  |
| 6 | #80 | O 2<br>Cu 1.617893 0.630672 -1.003066<br>Cu -0.628182 -1.201440 0.196948<br>Cu 1.000003 0.463350 1.369668<br>Cu -2.806791 -0.380740 -0.298293<br>Cu -0.979551 1.159361 -0.158958<br>O 1.320458 -1.592808 0.681408<br>C 2.036110 -1.237728 -0.344857<br>O 2.924210 -1.806221 -0.919535<br>O 0.741022 1.894215 0.111434    |
| 6 | #81 | O 2<br>Cu -1.678646 -0.365002 0.000272<br>Cu 0.839673 0.002585 -1.200202<br>Cu 0.841007 0.003923 1.200820<br>Cu 2.690326 -0.944070 -0.000475<br>Cu -0.676131 1.966448 -0.000522<br>O -0.855946 0.815755 -1.438710<br>O -0.855506 0.815949 1.437861<br>C -2.805527 -1.792563 0.000531<br>O -3.493231 -2.693861 0.000835   |
| 6 | #82 | O 2<br>Cu -1.568958 -0.483446 -1.103639<br>Cu 0.603330 1.125093 0.405539<br>Cu 1.025260 -1.145798 -0.248758<br>Cu 2.805781 0.453641 -0.252646<br>Cu -1.157241 -0.665514 1.301098<br>O -1.258687 1.173704 0.868602<br>O -0.704894 -1.873303 -0.077302<br>C -2.105983 1.297251 -0.600431<br>O -2.649055 2.322248 -0.709258 |
| 6 | #83 | O 2<br>Cu -1.618530 -0.630088 -1.002842<br>Cu 0.627794 1.201202 0.197211<br>Cu 0.979372 -1.159251 -0.160189<br>Cu 2.806601 0.380981 -0.298063<br>Cu -0.999053 -0.464378 1.369971<br>O -1.319969 1.592344 0.682034<br>O -0.741105 -1.894324 0.110671<br>C -2.035767 1.238155 -0.344400<br>O -2.923266 1.807677 -0.918975  |
| 6 | #84 | O 2                                                                                                                                                                                                                                                                                                                      |

|   |                           |                                                                                                                                                                                                                                                                                                                                                               |
|---|---------------------------|---------------------------------------------------------------------------------------------------------------------------------------------------------------------------------------------------------------------------------------------------------------------------------------------------------------------------------------------------------------|
|   |                           | Cu 1.120384 -1.471871 -0.044365<br>Cu -1.129174 -0.590893 -1.145857<br>Cu 0.519807 1.023956 -0.042000<br>Cu -1.833059 1.536791 -0.031944<br>Cu -1.065910 -0.514511 1.221524<br>O -0.621517 -2.036368 0.077813<br>O 2.119574 0.048311 0.107725<br>C 3.958417 0.545271 -0.152375<br>O 4.189457 1.639015 0.083318                                                |
| 6 | #85                       | O 2<br>Cu 1.344187 1.049658 0.095988<br>Cu -0.852646 0.638448 -1.258789<br>Cu -1.071708 0.785163 1.099961<br>Cu -2.125592 -1.183720 -0.062747<br>Cu 0.250438 -1.213563 0.152967<br>O 2.200315 -0.712391 0.314474<br>O -0.196613 2.050882 -0.090007<br>C 3.353073 -1.208844 -0.001819<br>O 4.382034 -0.707305 -0.322353                                        |
| 6 | #86                       | O 2<br>Cu 1.433578 1.230784 -0.000003<br>Cu -0.080810 -0.661004 -1.187605<br>Cu -1.187535 1.222460 -0.000078<br>Cu -2.262039 -0.942127 0.000147<br>Cu -0.080801 -0.660885 1.187704<br>O 1.581453 -0.679619 0.000049<br>O 0.134332 2.467202 -0.000506<br>C 2.940467 -1.710021 0.000204<br>O 3.972692 -1.191022 -0.000294                                       |
| 7 | $\text{Cu}_8(\text{O})_2$ | O 1<br>Cu 1.328177 -0.318493 1.279914<br>Cu -1.328273 -0.319057 -1.279940<br>Cu -0.000157 -2.031849 0.000244<br>Cu 2.477920 1.413016 -0.000311<br>Cu -0.000020 1.344844 -0.000309<br>Cu -1.328306 -0.318413 1.280116<br>Cu 1.328453 -0.319306 -1.279479<br>Cu -2.477810 1.413002 -0.000334<br>O 0.000036 -1.565843 -1.843562<br>O 0.000027 -1.565231 1.843925 |
| 7 | #87                       | O 1<br>Cu 0.002516 1.321968 -1.232995<br>Cu -0.003760 -1.321121 -1.232993<br>Cu -2.218693 0.004173 0.000333<br>Cu 1.739831 2.503272 0.000148<br>Cu 0.002191 1.321862 1.232753<br>Cu 1.694151 -0.003608 0.000057<br>Cu -0.004087 -1.321054 1.232762<br>Cu 1.727913 -2.510664 0.000116<br>O -1.203429 0.003251 -1.752477<br>O -1.203706 0.003219 1.752711       |

|          |            |     |           |           |           |
|----------|------------|-----|-----------|-----------|-----------|
|          |            | C   | -4.065791 | 0.006316  | -0.000324 |
|          |            | O   | -5.201246 | 0.007537  | -0.000645 |
| <b>7</b> | <b>#88</b> | O 1 |           |           |           |
|          |            | Cu  | 0.376936  | -1.296071 | -1.121771 |
|          |            | Cu  | 0.405689  | 1.286949  | -1.121977 |
|          |            | Cu  | 2.022103  | -0.022860 | 0.930695  |
|          |            | Cu  | -1.615193 | -2.482908 | -0.342820 |
|          |            | Cu  | -0.279901 | -1.318361 | 1.300257  |
|          |            | Cu  | -1.568096 | 0.017688  | -0.341925 |
|          |            | Cu  | -0.248516 | 1.324141  | 1.300642  |
|          |            | Cu  | -1.558257 | 2.518527  | -0.342309 |
|          |            | O   | 1.588591  | -0.017826 | -1.711242 |
|          |            | O   | 0.699682  | -0.008971 | 2.244110  |
|          |            | C   | 3.279250  | -0.035627 | -0.450832 |
|          |            | O   | 4.188770  | -0.044735 | -1.140114 |
| <b>7</b> | <b>#89</b> | O 1 |           |           |           |
|          |            | Cu  | 1.297240  | 0.618583  | -0.935208 |
|          |            | Cu  | -1.298223 | 0.616693  | -0.935390 |
|          |            | Cu  | -0.001273 | 1.759154  | 1.016622  |
|          |            | Cu  | 2.475721  | -1.476796 | -0.551017 |
|          |            | Cu  | 1.325282  | -0.434906 | 1.318604  |
|          |            | Cu  | 0.001109  | -1.484955 | -0.507415 |
|          |            | Cu  | -1.324503 | -0.436642 | 1.318652  |
|          |            | Cu  | -2.473537 | -1.480395 | -0.550739 |
|          |            | O   | -0.001633 | 1.935196  | -1.734987 |
|          |            | O   | -0.000173 | 0.420280  | 2.357619  |
|          |            | C   | -0.002126 | 2.774737  | -0.646279 |
|          |            | O   | -0.003182 | 3.970802  | -0.769074 |
| <b>7</b> | <b>#90</b> | O 1 |           |           |           |
|          |            | Cu  | -1.224507 | 0.231759  | 1.416164  |
|          |            | Cu  | 1.296358  | 0.509562  | -1.176981 |
|          |            | Cu  | 0.000001  | 2.069223  | 0.369482  |
|          |            | Cu  | -2.429130 | -1.376962 | -0.145625 |
|          |            | Cu  | -0.000295 | -1.309206 | -0.127092 |
|          |            | Cu  | 1.226125  | 0.231190  | 1.415490  |
|          |            | Cu  | -1.297321 | 0.508933  | -1.178429 |
|          |            | Cu  | 2.428884  | -1.377174 | -0.147572 |
|          |            | O   | -0.000413 | 1.858451  | -1.542207 |
| <b>7</b> | <b>#91</b> | O 1 |           |           |           |
|          |            | Cu  | 1.117664  | 0.876568  | -1.323729 |
|          |            | Cu  | -0.544771 | -0.441485 | 1.749746  |
|          |            | Cu  | 0.180736  | 1.784628  | 0.833892  |
|          |            | Cu  | 2.619063  | -1.018121 | -1.164155 |
|          |            | Cu  | 0.251549  | -1.225414 | -0.420406 |
|          |            | Cu  | -1.697242 | 0.756053  | -0.712160 |
|          |            | Cu  | 1.931306  | 0.010417  | 0.948048  |
|          |            | Cu  | -2.003781 | -1.687576 | 0.289843  |
|          |            | O   | 0.810051  | 0.779352  | 2.298492  |
|          |            | O   | -0.338486 | 2.032358  | -0.957556 |
|          |            | C   | -3.482758 | 0.461061  | -1.062052 |
|          |            | O   | -4.582148 | 0.267866  | -1.273304 |

|   |     |                                                                                                                                                                                                                                                                                                                                                                                                                                  |
|---|-----|----------------------------------------------------------------------------------------------------------------------------------------------------------------------------------------------------------------------------------------------------------------------------------------------------------------------------------------------------------------------------------------------------------------------------------|
| 7 | #92 | O 1<br>Cu 0.946020 1.364345 -0.744288<br>Cu -0.758342 -1.218085 1.284497<br>Cu -0.244097 1.290660 1.459934<br>Cu 2.718159 -0.250858 -1.141469<br>Cu 0.399187 -1.063848 -0.877896<br>Cu -1.684030 0.322567 -0.493932<br>Cu 1.688377 -0.257745 1.086089<br>Cu -1.828336 -2.093914 -0.723001<br>O 0.339335 -0.205613 2.449225<br>O -0.517049 2.353831 -0.071829<br>C -2.203940 2.143124 -0.872895<br>O -2.653236 3.156872 -1.178732 |
| 7 | #93 | O 1<br>Cu 1.198734 0.752489 -0.880108<br>Cu -1.308106 -0.610652 1.274721<br>Cu -0.004078 1.639477 1.412791<br>Cu 2.480703 -1.370352 -0.689502<br>Cu 0.003776 -1.401708 -0.686711<br>Cu -1.202245 0.746121 -0.879324<br>Cu 1.311726 -0.603518 1.274119<br>Cu -2.473142 -1.383204 -0.689112<br>O 0.000062 0.104359 2.448232<br>O -0.009194 3.004096 0.077763<br>C -0.008478 2.509031 -1.124231<br>O -0.011217 3.098408 -2.178993   |
| 7 | #94 | O 1<br>Cu 1.014403 1.258401 -0.846502<br>Cu -0.832074 -1.063976 1.351110<br>Cu -0.231040 1.414050 1.390736<br>Cu 2.723022 -0.455852 -1.071653<br>Cu 0.360946 -1.144252 -0.798569<br>Cu -1.606191 0.398076 -0.582048<br>Cu 1.655690 -0.233016 1.119969<br>Cu -1.928877 -2.018107 -0.604935<br>O 0.315224 -0.034137 2.465370<br>O -0.519455 2.266383 -0.291032<br>C -1.838808 3.038684 -0.981094<br>O -2.606717 2.175695 -1.286651 |
| 7 | #95 | O 1<br>Cu 0.353389 1.243378 -1.077321<br>Cu -0.421749 -1.011020 1.450758<br>Cu -1.127863 1.455582 0.966592<br>Cu 2.794513 0.620227 -0.859262<br>Cu 1.069070 -1.061600 -0.500103<br>Cu -1.358124 -0.547007 -0.870319<br>Cu 1.428738 0.768474 1.141224<br>Cu -0.569305 -2.824171 -0.150639<br>O -0.070102 0.657976 2.300350<br>O -2.562979 2.315579 -0.166128<br>C -3.085358 1.682319 -1.057348<br>O -2.914328 0.680706 -1.707085  |

|   |                              |                                                                                                                                                                                                                                                                                                                                                                                                |
|---|------------------------------|------------------------------------------------------------------------------------------------------------------------------------------------------------------------------------------------------------------------------------------------------------------------------------------------------------------------------------------------------------------------------------------------|
| 7 | #96                          | O 1<br>Cu -1.590371 -0.127050 1.256858<br>Cu 1.560378 0.294930 -0.544027<br>Cu 0.300179 1.381802 1.511489<br>Cu -2.708639 -0.319264 -1.023203<br>Cu -0.445731 -1.142041 -0.729415<br>Cu 0.680596 -1.031836 1.484577<br>Cu -0.918018 1.286663 -0.777798<br>Cu 1.764248 -2.112396 -0.531339<br>O 0.680939 2.186857 -0.216065<br>C 2.008594 2.921706 -1.045887<br>O 2.733031 2.035187 -1.345414   |
| 7 | #97                          | O 1<br>Cu -1.412795 1.220102 1.051166<br>Cu 0.891932 -1.219379 -0.229604<br>Cu 0.562474 -0.000244 1.891327<br>Cu -1.101741 2.398342 -1.105820<br>Cu -1.078966 0.000248 -1.066437<br>Cu -1.413526 -1.219378 1.051203<br>Cu 0.892697 1.218671 -0.229614<br>Cu -1.103246 -2.397811 -1.105795<br>O 4.962298 1.158635 -0.337620<br>C 4.955621 -0.000725 -0.337737<br>O 4.962483 -1.160086 -0.338621 |
| 7 | $\text{Cu}_8\text{-C}_1(97)$ | O 1<br>Cu -1.218975 0.432323 1.321794<br>Cu 1.219010 0.432322 -1.321605<br>Cu -0.000322 2.124830 -0.000169<br>Cu -2.397225 -1.300609 0.000111<br>Cu 0.000105 -1.253265 0.000114<br>Cu 1.218987 0.432696 1.321576<br>Cu -1.219056 0.432120 -1.321874<br>Cu 2.397477 -1.300417 0.000053                                                                                                          |
| 8 | #98                          | O 2<br>Cu 1.912525 -0.440882 -0.046350<br>Cu -0.740598 -0.537029 1.284475<br>Cu -0.730889 -0.743390 -1.146833<br>Cu -2.460273 0.605383 -0.167150<br>Cu -0.156602 1.427377 0.068367<br>O 0.779885 -1.601872 1.072984<br>O 0.774528 -1.798855 -0.788201<br>C 3.173686 0.825208 -0.122070<br>O 3.952730 1.652776 -0.166075                                                                        |
| 8 | #99                          | O 2<br>Cu 1.661536 1.110663 0.529584<br>Cu 0.888972 -1.204636 -0.434577<br>Cu -0.632053 0.735856 -0.824127<br>Cu -1.420258 -1.641725 0.067429<br>Cu -0.102057 -0.183934 1.564732<br>O 2.146269 0.200973 -1.005546<br>O 0.483164 -0.114629 -2.047196                                                                                                                                            |



|          |             |     |           |           |           |
|----------|-------------|-----|-----------|-----------|-----------|
|          |             | C   | -1.875063 | 1.978242  | -0.325262 |
|          |             | O   | -2.659147 | 2.721161  | 0.023164  |
| <b>8</b> | <b>#100</b> | O 2 |           |           |           |
|          |             | Cu  | 2.552058  | 1.465459  | 0.676355  |
|          |             | Cu  | 0.321901  | 0.548728  | -0.618664 |
|          |             | Cu  | -2.933873 | 0.116959  | 0.008741  |
|          |             | Cu  | 0.056791  | -1.664660 | 0.444734  |
|          |             | Cu  | 2.308146  | -0.959674 | -0.279868 |
|          |             | O   | 2.129063  | 0.849574  | -0.988272 |
|          |             | O   | -1.232859 | -0.319492 | -0.067072 |
|          |             | C   | -4.660883 | 0.554741  | 0.094635  |
|          |             | O   | -5.756251 | 0.841669  | 0.145911  |
| <b>8</b> | <b>#101</b> | O 1 |           |           |           |
|          |             | Cu  | -1.945672 | 1.337701  | 0.025810  |
|          |             | Cu  | 1.657921  | 0.367055  | -1.012412 |
|          |             | Cu  | -0.882514 | -0.401107 | -1.359609 |
|          |             | Cu  | -2.878063 | -0.914739 | -0.003422 |
|          |             | Cu  | -0.741119 | -0.542081 | 1.115572  |
|          |             | Cu  | 0.540491  | 1.574267  | 0.927017  |
|          |             | Cu  | 0.700263  | -1.956377 | -0.270598 |
|          |             | Cu  | 1.651560  | -0.490154 | 1.553242  |
|          |             | O   | 0.169971  | 1.069158  | -1.842035 |
|          |             | O   | -0.489510 | 2.441991  | -0.364672 |
|          |             | C   | 3.471938  | 0.202834  | -0.823308 |
|          |             | O   | 4.592688  | 0.053927  | -0.712363 |
| <b>8</b> | <b>#102</b> | O 1 |           |           |           |
|          |             | Cu  | -1.371974 | -2.136099 | -0.419692 |
|          |             | Cu  | 0.782522  | 0.880378  | 1.253310  |
|          |             | Cu  | -1.468136 | -0.165680 | 1.318257  |
|          |             | Cu  | -2.614589 | -0.000392 | -0.803364 |
|          |             | Cu  | -0.149225 | -0.109408 | -0.939539 |
|          |             | Cu  | 2.095949  | -0.937550 | -0.096291 |
|          |             | Cu  | -1.104059 | 1.939791  | 0.070099  |
|          |             | Cu  | 1.438773  | 1.667823  | -0.931474 |
|          |             | O   | 0.253316  | -0.850873 | 1.941204  |
|          |             | O   | 0.411405  | -1.747828 | 0.367373  |
|          |             | C   | 3.930799  | -0.935192 | -0.110711 |
|          |             | O   | 5.053608  | -0.828286 | -0.236534 |
| <b>8</b> | <b>#103</b> | O 1 |           |           |           |
|          |             | Cu  | 1.091224  | 2.179844  | -0.284177 |
|          |             | Cu  | -1.233194 | -0.954644 | 0.757236  |
|          |             | Cu  | 0.995053  | 0.449448  | 1.493466  |
|          |             | Cu  | 2.654163  | 0.331785  | -0.238031 |
|          |             | Cu  | 0.172664  | 0.048599  | -1.077372 |
|          |             | Cu  | -1.986944 | 1.351906  | -0.335175 |
|          |             | Cu  | 1.018186  | -1.778840 | 0.422989  |
|          |             | Cu  | -0.633114 | -2.213610 | -1.362040 |
|          |             | O   | 0.132898  | -1.109484 | 2.090084  |
|          |             | O   | -0.538993 | 1.890554  | -1.241381 |
|          |             | C   | -3.524617 | 0.930196  | 0.500989  |
|          |             | O   | -4.483333 | 0.643766  | 1.034306  |

|           |            |                                                                                                                                                                                                                                                                                                                                                             |
|-----------|------------|-------------------------------------------------------------------------------------------------------------------------------------------------------------------------------------------------------------------------------------------------------------------------------------------------------------------------------------------------------------|
| <b>S3</b> | <b>#S1</b> |                                                                                                                                                                                                                                                                                                                                                             |
| <b>S3</b> | <b>#S2</b> | O 2<br>Cu 0.965857 1.948948 -0.000117<br>Cu 0.358554 -0.502204 0.000118<br>Cu -2.718720 -0.308182 0.000013<br>Cu 2.083528 -2.138252 0.000124<br>Cu 2.684539 0.214779 -0.000194<br>O -1.176147 0.574181 0.000217<br>C -4.291151 -1.172839 -0.000195<br>O -5.275485 -1.732082 -0.000322<br>C -0.891003 2.466539 0.000179<br>O -1.891624 3.032929 0.000322     |
| <b>S3</b> | <b>#S3</b> | O 2<br>Cu 0.651333 1.916611 0.000000<br>Cu 0.744016 -0.700305 0.000228<br>Cu -3.236494 -0.093924 0.000089<br>Cu 2.849498 -1.790388 -0.000130<br>Cu 2.760151 0.646507 -0.000161<br>O -1.167106 -0.123178 0.000341<br>C -4.770760 -1.051225 -0.000196<br>O -5.736750 -1.640498 -0.000390<br>C -1.162709 1.208987 0.000206<br>O -2.306869 1.723289 -0.000052   |
| <b>S3</b> | <b>#S4</b> | O 2<br>Cu -0.337356 -1.842655 0.835925<br>Cu 0.451343 -0.101345 -0.947047<br>Cu -1.767221 1.017538 -0.173588<br>Cu 2.480426 1.078334 -0.644725<br>Cu 1.687295 -0.452928 1.094550<br>O -1.510612 -0.478680 -1.248718<br>C -2.075146 2.503653 0.821970<br>O -2.247910 3.435343 1.435429<br>C -1.688272 -1.708349 -0.583657<br>O -2.533927 -2.461810 -0.963986 |
| <b>S3</b> | <b>#S5</b> | O 2<br>Cu 0.089873 -1.853650 0.681069<br>Cu 0.971455 0.219755 -0.318252<br>Cu -1.333353 -0.270999 -0.566514<br>Cu -0.659810 2.055165 -0.108761<br>Cu -0.567338 0.323098 1.648646<br>O 3.234422 0.523784 -0.378979<br>C -2.921944 -0.743932 -1.349212<br>O -3.895346 -1.039129 -1.859376<br>C 4.192411 -0.046319 -0.717834<br>O 5.142574 -0.607931 -1.055047 |
| <b>S3</b> | <b>#S6</b> | O 2<br>Cu -1.770985 -0.380673 -0.332075<br>Cu 1.133375 -0.453112 -1.468225<br>Cu 0.415807 -1.370090 0.641215<br>Cu 2.644690 -0.151187 0.422765<br>Cu 0.514725 1.026149 0.528440                                                                                                                                                                             |

|           |             |                                                                                                                                                                                                                                                                                                                                                                                                                           |
|-----------|-------------|---------------------------------------------------------------------------------------------------------------------------------------------------------------------------------------------------------------------------------------------------------------------------------------------------------------------------------------------------------------------------------------------------------------------------|
|           |             | O -0.422650 -1.497333 -1.131813<br>C 0.126177 2.836001 0.691537<br>O -0.141695 3.917575 0.919539<br>C -2.438801 1.255752 -0.950640<br>O -2.834668 2.259903 -1.307559<br>C -2.843977 -1.340913 0.947810<br>O -3.382380 -1.925969 1.756868                                                                                                                                                                                  |
| <b>S3</b> | <b>#S7</b>  | O 2<br>Cu 1.287694 1.088379 0.000014<br>Cu 0.406936 -1.041837 1.216319<br>Cu 0.406980 -1.041868 -1.216274<br>Cu -1.587800 -1.777906 -0.000005<br>Cu -1.129119 0.611402 -0.000025<br>O 1.994822 -0.833687 0.000047<br>C -2.874697 1.323615 -0.000078<br>O -3.963774 1.646407 -0.000110<br>C 0.086011 2.472496 -0.000044<br>O -0.301983 3.552693 -0.000074<br>C 3.126107 0.514041 0.000054<br>O 4.248360 0.238610 0.000080  |
| <b>S3</b> | <b>#S8</b>  | O 2<br>Cu 1.644655 0.465678 -0.039890<br>Cu 0.067901 -1.303032 0.608636<br>Cu -0.435721 -0.371792 -1.605287<br>Cu -2.262562 -1.160770 -0.075247<br>Cu -0.901609 0.845126 0.418207<br>O 1.688802 -2.715261 0.880947<br>C -1.564104 2.509068 0.849262<br>O -1.991463 3.516895 1.152584<br>C 2.005565 2.255799 -0.416317<br>O 2.091516 3.355757 -0.676652<br>C 2.095742 -1.595126 0.601155<br>O 3.149837 -1.007334 0.381775  |
| <b>S3</b> | <b>#S9</b>  | O 2<br>Cu 0.925671 1.294227 0.220274<br>Cu -0.430532 0.005962 -1.463758<br>Cu -1.600892 1.367182 0.195578<br>Cu -2.650898 -0.753396 -0.581527<br>Cu -0.568881 -0.667667 0.784794<br>O 3.387484 -2.903533 -1.382559<br>C -0.171038 -1.884849 2.084263<br>O 0.088654 -2.637547 2.898138<br>C 2.440335 2.411741 0.505367<br>O 3.329921 3.076144 0.727375<br>C 3.837281 -1.945529 -0.911102<br>O 4.294063 -0.988954 -0.440029 |
| <b>S6</b> | <b>#S10</b> | O 2<br>Cu -0.513059 1.927057 0.000593<br>Cu 0.636120 -0.759488 -0.079069<br>Cu -2.410678 -1.093446 -0.011462<br>Cu 2.827877 -1.729409 -0.047717                                                                                                                                                                                                                                                                           |

|           |             |                                                                                                                                                                                                                                                                                                                                                                                             |
|-----------|-------------|---------------------------------------------------------------------------------------------------------------------------------------------------------------------------------------------------------------------------------------------------------------------------------------------------------------------------------------------------------------------------------------------|
|           |             | Cu 2.578833 0.636810 0.101773<br>O -1.052096 0.018655 -0.118031<br>C -3.800906 -2.207826 0.091538<br>O -4.679314 -2.920810 0.158615<br>C -1.844961 3.173675 -0.052975<br>O -2.675426 3.947224 -0.086251<br>O 1.334527 1.922520 0.146818                                                                                                                                                     |
| <b>S6</b> | <b>#S11</b> | O 2<br>Cu 0.758434 2.023627 0.176841<br>Cu 0.282508 -0.629203 -0.195545<br>Cu -2.833223 -0.330038 0.043165<br>Cu 2.024261 -2.273855 -0.159702<br>Cu 2.609250 0.009830 0.110948<br>O -1.250320 0.428576 -0.236630<br>C -4.446393 -1.064926 0.324925<br>O -5.458552 -1.539156 0.501140<br>C -0.985002 2.333150 -0.454987<br>O -1.951318 2.823745 -0.834322<br>O 2.434279 1.684357 0.755422    |
| <b>S6</b> | <b>#S12</b> | O 2<br>Cu -0.578586 1.882117 -0.000046<br>Cu -0.596146 -0.858448 0.000015<br>Cu 3.338542 -0.059436 -0.000019<br>Cu -2.696427 -1.994065 0.000099<br>Cu -2.690452 0.380549 -0.000338<br>O 1.263924 -0.175854 0.000131<br>C 4.903468 -0.965720 0.000077<br>O 5.887815 -1.523447 0.000136<br>C 1.206706 1.156896 -0.000096<br>O 2.336135 1.706596 -0.000303<br>O -2.386881 2.202978 0.001099    |
| <b>S6</b> | <b>#S13</b> | O 2<br>Cu -0.346993 -1.886881 0.604663<br>Cu 0.474583 0.182269 -1.021990<br>Cu -1.987121 0.919967 -0.174995<br>Cu 2.534607 1.316319 -0.606131<br>Cu 1.766271 -0.303080 0.964984<br>O -1.419980 -0.314479 -1.441777<br>C -2.579956 2.158558 1.016352<br>O -2.931412 2.925972 1.763223<br>C -1.483548 -1.639021 -0.936288<br>O -2.158138 -2.435439 -1.523797<br>O 0.707273 -1.394358 1.988630 |
| <b>S6</b> | <b>#S14</b> | O 2<br>Cu 0.074288 1.389783 -0.000132<br>Cu -2.249193 0.193346 0.000111<br>Cu 3.044420 -0.203506 -0.000062<br>Cu -2.356173 -2.192911 0.000090<br>Cu -0.229330 -1.163124 -0.000164<br>O -2.570035 2.136791 0.000176<br>C 4.825542 -0.362077 0.000218                                                                                                                                         |

|   |           |           |           |
|---|-----------|-----------|-----------|
| O | 5.953119  | -0.459687 | 0.000416  |
| C | -1.426173 | 2.669148  | 0.000076  |
| O | -0.999411 | 3.800957  | 0.000073  |
| O | 1.287254  | -0.043870 | -0.000316 |
